# Supplementary material for: Antiproliferative Aspidosperma-Type Monoterpenoid Indole Alkaloids from Bousigonia mekongensis Inhibit Tubulin Polymerization
Source: PubMed Central journal article supplement (PMC6480704; doi:10.3390/molecules24071256), 2019-03-31

## Supporting Information

for

### Cytotoxic aspidosperma-type monoterpenoid indole alkaloids from *Bousigonia mekongensis* inhibit tubulin polymerization

Yu Zhang<sup>a,b</sup>, Masuo Goto<sup>b,\*\*</sup>, Akifumi Oda<sup>c</sup>, Pei-Ling Hsu<sup>b</sup>, Ling-Li Guo<sup>a</sup>, Yan-Hui Fu<sup>a</sup>, Susan L. Morris-Natschke<sup>b</sup>, Ernest Hamel<sup>d</sup>, Kuo-Hsiung Lee<sup>b,e,\*\*</sup> Xiao-Jiang Hao<sup>a,\*</sup>

<sup>a</sup>*State Key Laboratory of Phytochemistry and Plant Resources in West China, Kunming Institute of Botany, Chinese Academy of Sciences, Kunming 650201, Yunnan, People's Republic of China*

<sup>b</sup>*Natural Product Research Laboratories, UNC Eshelman School of Pharmacy, University of North Carolina, Chapel Hill, NC 27599, USA*

<sup>c</sup>*Graduate School of Pharmacy, Meijo University, 150 Yagotoyama, Tempaku-ku, Nagoya, Aichi 468-8503, Japan*

<sup>d</sup>*Screening Technologies Branch, Developmental Therapeutics Program, Division of Cancer Treatment and Diagnosis, Frederick National Laboratory for Cancer Research, National Cancer Institute, Frederick, Maryland, 21702, USA*

<sup>e</sup>*Chinese Medicine Research and Development Center, China Medical University and Hospital, 2 Yuh-Der Road, Taichung, 40447, Taiwan*

**Contents:**

Supplementary Figure S1. **Inhibition of tubulin polymerization by compounds.**

Supplementary Figure S2. **Predicted docking models for 3, 4, 11, and 13 binding in the CS.**

Supplementary Tables S1-S3.  **$^1\text{H}$  and  $^{13}\text{C}$  NMR data ( $\delta$ ) for compounds 1-14.**

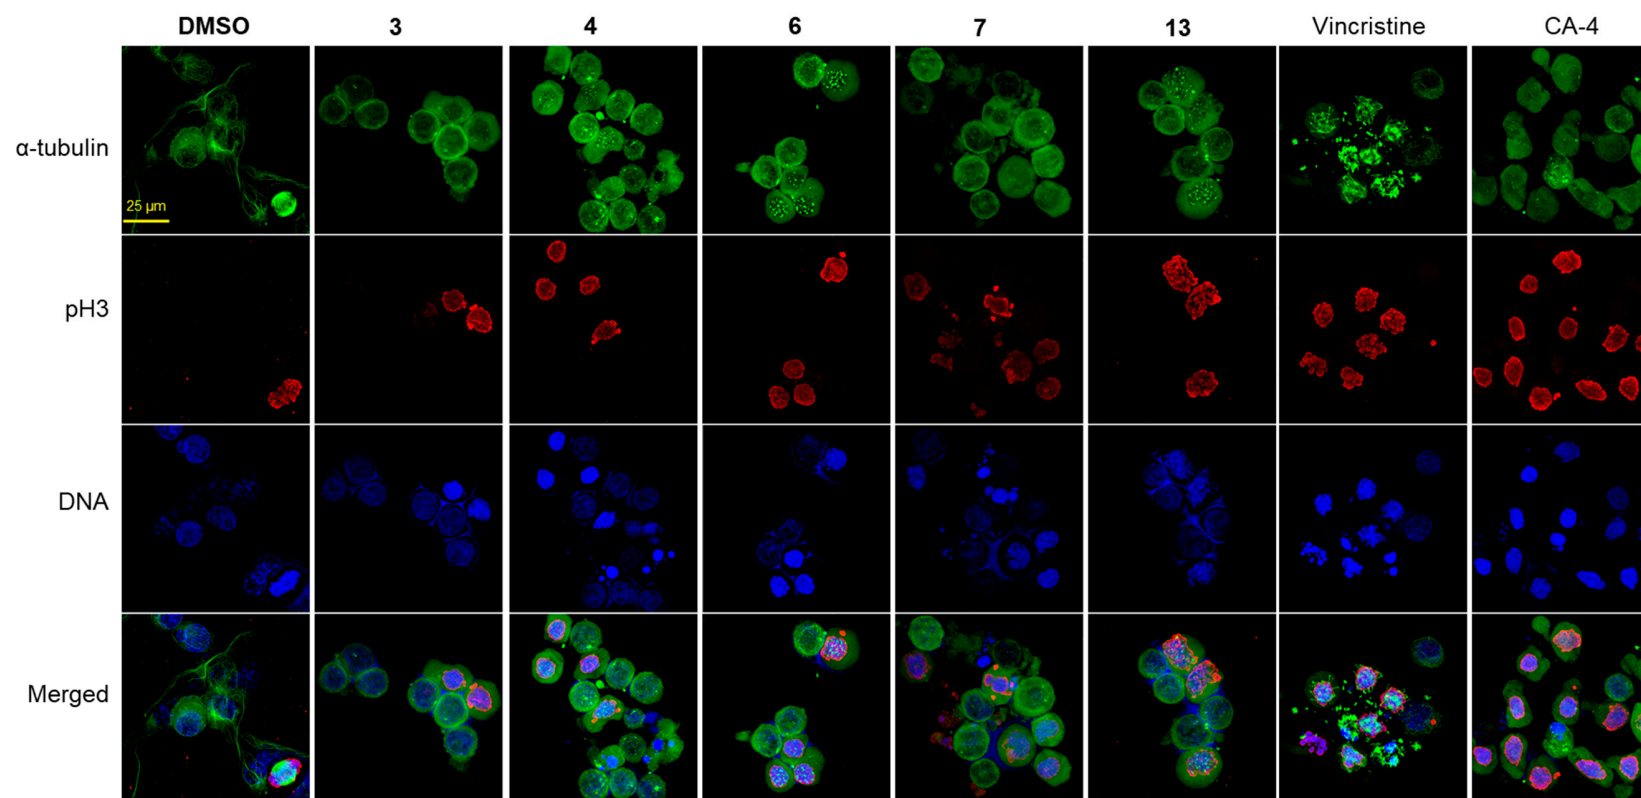

**Supplemental Figure S1. Inhibition of tubulin polymerization by compounds.**

Vincristine-resistant KB-VIN cells were treated with compounds for 24 h at a concentration of  $3 \times IC_{50}$ . Fixed cells were stained with antibodies to  $\alpha$ -tubulin (green) and phospho-histone H3 (pH3, red), and DAPI was used for DNA (blue). Stained cells were observed by confocal fluorescence microscope, and confocal images were reconstructed. Bar, 0.025 mm.

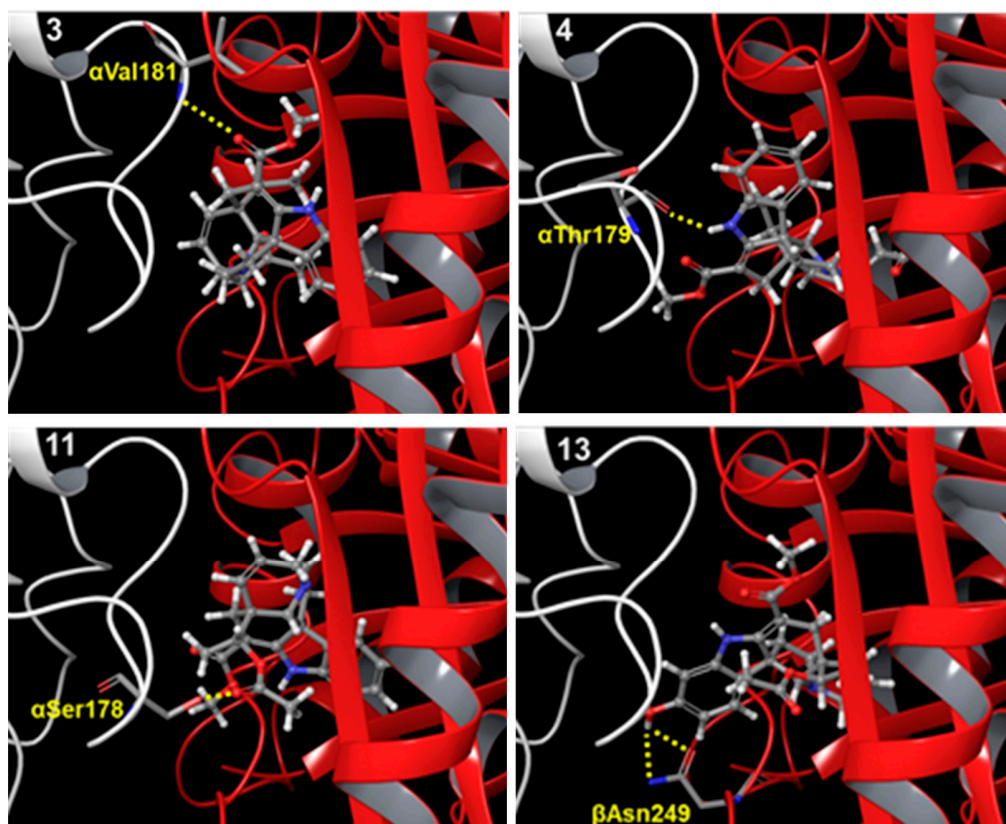

**Supplementary Figure S2. Predicted docking models for 3, 4, 11, and 13 binding in the CS.**

The crystal structures (PDB: 1SA0) of  $\alpha$ - (white) and  $\beta$ -tubulin (red) are shown as ribbon diagrams. The distance calculated to be less than 5 Å between heavy atoms is represented by dashed lines. Docking models of compounds (gray skeleton with oxygen in red and nitrogen in blue) **3**, **4**, **11**, and **13** in the CS are shown. Superimposition of docked compounds with the specific amino acid residue forming H-bonds (yellow dashed line) are shown.

**Table S1.** <sup>1</sup>H NMR data ( $\delta$ ) for compounds **1-7** ( $\delta_{\text{H}}$ ,  $J$  in Hz).

| No. | <b>1</b> <sup>a</sup>       | <b>2</b> <sup>a</sup>       | <b>3</b> <sup>a</sup> | <b>4</b> <sup>a</sup> | <b>5</b> <sup>a</sup>       | <b>6</b> <sup>b</sup>       | <b>7</b> <sup>c</sup> |
|-----|-----------------------------|-----------------------------|-----------------------|-----------------------|-----------------------------|-----------------------------|-----------------------|
| NH  | 9.31 (s)                    | 9.20 (s)                    | 9.40 (s)              | 9.34 (s)              | 9.31 (s)                    | 8.90 (s)                    | 9.23 (s)              |
| 3a  | 3.42 (ddd, 16.0, 5.0, 1.5)  | 2.89 (m)                    | 4.00 (m)              | 4.05 (dd, 13.0, 5.5)  | 3.50 (dd, 12.5, 5.5)        | 3.50 (dd, 12.5, 5.5)        | 3.51 (dd, 12.0, 5.0)  |
| 3b  | 3.18 (dt, 16.0, 1.5)        | 2.58 (m)                    |                       |                       | 2.79 (d, 12.5)              | 2.88 (dd, 12.5, 3.5)        | 2.90 (dd, 12.0, 3.0)  |
| 5a  | 3.00 (t-like, 7.5)          | 3.10 (m)                    | 3.11 (m)              | 2.78 (m)              | 2.85 (dd, 8.5, 6.5)         | 2.86 (dd, 8.5, 6.5)         | 2.80 (dd, 8.0, 6.0)   |
| 5b  | 2.73 (m)                    | 2.42 (td, 12.0, 3.0)        | 2.99 (m)              | 2.82 (m)              | 2.48 (br d, 8.5)            | 2.43 (dd, 8.5, 4.0)         | 2.45 (dd, 8.5, 4.0)   |
| 6a  | 1.99 (ddd, 12.0, 11.0, 6.5) | 1.96 (ddd, 12.0, 11.5, 6.5) | 2.03 (m)              | 1.83 (m)              | 1.86 (ddd, 12.0, 11.5, 7.0) | 1.91 (ddd, 12.0, 11.5, 7.0) | 1.97 (m)              |
| 6b  | 1.71 (dd, 11.0, 4.0)        | 1.60 (12.0, 5.0)            | 1.90 (m)              | 1.62 (dd, 11.0, 4.0)  | 1.60 (dd, 12.0, 4.5)        | 1.68 (dd, 12.0, 5.0)        | 1.63 (m)              |
| 9   | 7.29 (d, 7.5)               | 7.24 (d, 7.5)               | 7.34 (d, 7.5)         | 7.21 (d, 7.5)         | 7.21 (d, 7.5)               | 7.01 (d, 8.0)               | 7.01 (d, 8.0)         |
| 10  | 6.85 (td, 7.5, 1.0)         | 6.83 (td, 7.5, 1.5)         | 6.86 (t, 7.5)         | 6.84 (t, 7.5)         | 6.83 (t, 7.5)               | 6.37 (dd, 8.0, 2.0)         | 6.33 (dd, 8.0, 2.0)   |
| 11  | 7.13 (td, 7.5, 1.0)         | 7.10 (td, 7.5, 1.5)         | 7.13 (t, 7.5)         | 7.13 (t, 7.5)         | 7.11 (t, 7.5)               |                             |                       |
| 12  | 7.02 (d, 7.5)               | 7.00 (d, 7.5)               | 7.03 (d, 7.5)         | 7.03 (d, 7.5)         | 7.00 (d, 7.5)               | 6.40 (d, 2.0)               | 6.57 (d, 2.0)         |
| 14a | 5.78 (ddd, 10.0, 5.0, 1.5)  | 1.81 (m)                    | 5.86 (dd, 10.0, 3.5)  | 3.56 (t, 4.2)         | 3.45 (dd, 5.5, 4.0)         | 3.48 (dd, 5.5, 3.5)         | 3.40 (dd, 5.0, 3.0)   |
| 14b |                             | 1.53 (m)                    |                       |                       |                             |                             |                       |

|                                   |                      |                      |                      |                |                      |                      |                |
|-----------------------------------|----------------------|----------------------|----------------------|----------------|----------------------|----------------------|----------------|
| 15a                               | 5.69 (dt, 10.0, 2.0) | 1.78 (m)             | 5.75 (d, 10.0)       | 3.15 (d, 4.2)  | 3.06 (d, 4.0)        | 3.10 (d, 3.5)        | 3.06 (d, 3.0)  |
| 15b                               |                      | 1.26 (m)             |                      |                |                      |                      |                |
| 17a                               | 2.53 (dd, 14.0, 2.0) | 2.73 (d, 13.0)       | 2.59 (d, 12.5)       | 2.57 (d, 14.5) | 2.55 (dd, 15.0, 2.0) | 2.56 (dd, 15.0, 2.0) | 2.54 (d, 15.0) |
| 17b                               | 2.47 (d, 14.0)       | 2.26 (dd, 13.0, 2.0) | 2.17 (d, 12.5)       | 2.36 (d, 14.5) | 2.48 (dd, 15.0, 5.0) | 2.47 (d, 15.0, 5.0)  | 2.45 (d, 15.0) |
| 18                                | 0.62 (t, 7.5)        | 0.57 (t, 7.5)        | 0.66 (t, 7.5)        | 0.72 (t, 7.5)  | 0.70 (t, 7.5)        | 0.74 (t, 7.5)        | 0.72 (t, 8.0)  |
| 19a                               | 0.98 (m)             | 0.96 (m)             | 1.03 (m)             | 1.03 (m)       | 1.03 (m)             | 1.13 (m)             | 1.05 (m)       |
| 19b                               | 0.82 (m)             | 0.62 (m)             | 0.90 (m)             | 0.84 (m)       | 0.83 (m)             | 0.90 (m)             | 0.90 (m)       |
| 21                                | 2.68 (br s)          | 2.48 (s)             | 3.10 (br s)          | 2.73 (s)       | 2.40 (br s)          | 2.40 (br s)          | 2.34 (br s)    |
| CO <sub>2</sub> CH <sub>3</sub>   | 3.69 (s)             | 3.68 (s)             | 3.69 (s)             | 3.70 (s)       | 3.71 (s)             | 3.77 (s)             | 3.70 (s)       |
| 11-OCH <sub>3</sub>               |                      |                      |                      |                |                      | 3.79 (s)             |                |
| CH <sub>2</sub> COCH <sub>3</sub> |                      |                      | 2.86 (dd, 13.0, 6.5) | 2.96 (m)       |                      |                      |                |
|                                   |                      |                      | 2.67 (dd, 13.0, 5.5) | 2.96 (m)       |                      |                      |                |
| CH <sub>2</sub> COCH <sub>3</sub> |                      |                      | 2.21 (s)             | 2.23 (s)       |                      |                      |                |

<sup>a</sup>500 MHz, acetone-*d*<sub>6</sub>; <sup>b</sup>500 MHz, CDCl<sub>3</sub>; <sup>c</sup>400 MHz, acetone-*d*<sub>6</sub>.

**Table S2.** <sup>1</sup>H NMR data ( $\delta$ ) for compounds **8-14** ( $\delta_{\text{H}}$ ,  $J$  in Hz).

| No. | <b>8<sup>a</sup></b>           | <b>9<sup>a</sup></b>           | <b>10<sup>b</sup></b>          | <b>11<sup>a</sup></b>         | <b>12<sup>a</sup></b>         | <b>13<sup>b</sup></b>         | <b>14<sup>b</sup></b>          |
|-----|--------------------------------|--------------------------------|--------------------------------|-------------------------------|-------------------------------|-------------------------------|--------------------------------|
| NH  | 9.30 (s)                       | 9.27 (s)                       | 8.92 (s)                       | 9.33 (s)                      | 9.29 (s)                      | 9.12 (s)                      | 8.95 (s)                       |
| 3a  | 3.44 (br d, 13.0)              | 3.41 (br d, 13.0)              | 3.48 (ddd, 16.5,<br>5.0, 1.5)  | 3.46 (ddd, 16.0,<br>4.5, 1.5) | 3.41 (ddd, 16.0,<br>5.0, 2.0) | 3.49 (ddd, 13.5,<br>4.0, 1.0) | 3.46 (ddd, 16.0,<br>5.5, 1.5)  |
| 3b  | 2.90 (br d, 13.0)              | 2.93 (br d, 13.0)              | 3.26 (dd, 16.5,<br>1.5)        | 3.25 (dd, 16.0,<br>1.5)       | 3.16 (dt, 16.0,<br>2.0)       | 3.25 (dd, 13.5,<br>1.0)       | 3.20 (dt, 15.0,<br>1.5)        |
| 5a  | 2.93 (m)                       | 3.02 (m)                       | 3.08 (ddd, 9.0,<br>7.0, 1.5)   | 3.03 (ddd, 9.5,<br>7.5, 1.5)  | 2.98 (t-like, 7.5)            | 3.07 (ddd, 8.0,<br>6.0, 1.5)  | 3.03 (ddd, 8.0,<br>6.0, 1.5)   |
| 5b  | 2.74 (11.0, 8.5, 5.0)          | 2.73 (m)                       | 2.78 (ddd, 9.0,<br>6.0, 2.0)   | 2.78 (m)                      | 2.70 (ddd, 11.0,<br>6.5, 4.5) | 2.75 (m)                      | 2.71 (m)                       |
| 6a  | 1.94 (ddd, 11.5, 11.0,<br>7.0) | 2.01 (ddd, 11.0,<br>10.0, 6.5) | 2.14 (ddd, 12.0,<br>10.0, 6.0) | 2.01 (dd, 11.0,<br>6.5)       | 1.97 (12.0, 11.0,<br>6.5)     | 2.09 (ddd, 10.0,<br>9.0, 5.5) | 2.05 (ddd, 12.0,<br>11.0, 6.5) |
| 6b  | 1.62 (dd, 11.5, 5.0)           | 1.58 (dd, 11.0,<br>5.0)        | 1.88 (ddd, 12.0,<br>6.0, 2.0)  | 1.75 (ddd, 11.0,<br>6.0, 1.5) | 1.69 (12.0, 4.5,<br>1.0)      | 1.85 (ddd, 10.0,<br>4.5, 1.0) | 1.80 (ddd, 12.0,<br>6.0, 1.5)  |
| 9   | 7.25 (d, 7.5)                  | 7.18 (d, 7.5)                  | 7.29 (d, 7.5)                  | 7.34 (d, 7.5)                 | 7.17 (d, 7.5)                 | 7.07 (d, 7.0)                 | 7.08 (d, 8.5)                  |
| 10  | 6.83 (t, 7.5)                  | 6.38 (d, 7.5)                  | 6.91 (td, 7.5, 1.5)            | 6.86 (td, 7.5, 1.5)           | 6.40 (dd, 7.5,<br>2.0)        | 6.34 (dd, 7.0,<br>2.0)        | 6.34 (dd, 8.5,<br>2.5)         |
| 11  | 7.13 (t, 7.5)                  |                                | 7.18 (td, 7.5, 1.5)            | 7.15 (td, 7.5, 1.5)           |                               |                               |                                |
| 12  | 7.02 (d, 7.5)                  | 6.65 (s)                       | 6.85 (d, 7.5)                  | 7.05 (d, 7.5)                 | 6.67 (d, 2.0)                 | 6.40 (d, 2.0)                 | 6.43 (d, 2.5)                  |
| 14  | 3.17 (br d, 3.5)               | 3.19 (br d, 3.5)               | 5.94 (ddd, 10.5,<br>5.0, 1.5)  | 5.95 (ddd, 10.0,<br>5.0, 1.5) | 5.77 (ddd, 10.0,<br>5.0, 2.0) | 5.97 (ddd, 8.5,<br>4.0, 1.5)  | 5.93 (ddd, 10.0,<br>5.0, 1.0)  |
| 15  | 2.96 (br d, 3.5)               | 2.94 (br d, 3.5)               | 5.82 (dt, 10.5,<br>1.5)        | 5.76 (dt, 10.0,<br>1.5)       | 5.68 (dt, 10.0,<br>2.0)       | 5.81 (dt, 8.5, 2.0)           | 5.77 (dt, 10.0,<br>1.0)        |

|                                 |               |                   |                      |                |                      |                      |                      |
|---------------------------------|---------------|-------------------|----------------------|----------------|----------------------|----------------------|----------------------|
| 17a                             | 2.56 (br s)   | 2.54 (br d, 13.0) | 2.91 (dd, 15.0, 2.0) | 2.79 (d, 17.4) | 2.50 (dd, 15.0, 1.5) | 2.81 (dd, 15.0, 1.5) | 2.77 (dd, 15.0, 2.0) |
| 17b                             | 2.56 (br s)   | 2.54 (br d, 13.0) | 2.52 (d, 15.0)       | 2.46 (d, 17.4) | 2.45 (d, 15.0)       | 2.45 (d, 12.5)       | 2.42 (d, 15.0)       |
| 18                              | 0.71 (t, 7.5) | 0.72 (t, 7.5)     | 0.90 (d, 7.0)        | 0.90 (d, 6.5)  | 0.62 (t, 7.5)        | 0.95 (d, 5.0)        | 0.92 (d, 6.5)        |
| 19a                             | 0.92 (q, 7.5) | 1.01 (m)          | 3.36 (q, 7.0)        | 4.51 (q, 6.5)  | 0.98 (m)             | 4.63 (q, 5.0)        | 4.56 (q, 6.5)        |
| 19b                             | 0.92 (q, 7.5) | 0.89 (m)          |                      |                | 0.82 (m)             |                      |                      |
| 21                              | 2.51 (s)      | 2.50 (s)          | 2.80 (s)             | 2.85 (s)       | 2.62 (br s)          | 2.76 (s)             | 2.73 (s)             |
| CO <sub>2</sub> CH <sub>3</sub> | 3.70 (s)      | 3.69 (s)          | 3.81 (s)             | 3.65 (s)       | 3.69 (s)             | 3.76 (s)             | 3.73 (s)             |
| 11-OCH <sub>3</sub>             |               | 3.75 (s)          |                      |                | 3.74 (s)             |                      | 3.79 (s)             |
| 19-OAc                          |               |                   |                      | 1.91 (s)       |                      | 1.93 (s)             |                      |

<sup>a</sup>500 MHz, acetone-*d*<sub>6</sub>; <sup>b</sup>500 MHz, CDCl<sub>3</sub>;



**Table S3.** <sup>13</sup>C NMR data ( $\delta$ ) for compounds **1-14**.

| No.                | <b>1<sup>a</sup></b> | <b>2<sup>a</sup></b> | <b>3<sup>a</sup></b> | <b>4<sup>a</sup></b> | <b>5<sup>a</sup></b> | <b>6<sup>b</sup></b> | <b>7<sup>c</sup></b> | <b>8<sup>a</sup></b> | <b>9<sup>a</sup></b> | <b>10<sup>b</sup></b> | <b>11<sup>a</sup></b> | <b>12<sup>a</sup></b> | <b>13<sup>b</sup></b> | <b>14<sup>b</sup></b> |
|--------------------|----------------------|----------------------|----------------------|----------------------|----------------------|----------------------|----------------------|----------------------|----------------------|-----------------------|-----------------------|-----------------------|-----------------------|-----------------------|
| 2                  | 167.0                | 167.9                | 165.9                | 167.6                | 167.7                | 168.2                | 168.5                | 165.7                | 166.3                | 167.8                 | 167.5                 | 167.5                 | 167.5                 | 167.3                 |
| 3                  | 51.0                 | 52.1                 | 53.1                 | 50.7                 | 50.1                 | 50.2                 | 50.6                 | 49.7                 | 49.7                 | 51.4                  | 50.6                  | 50.8                  | 50.7                  | 50.5                  |
| 5                  | 51.4                 | 50.9                 | 51.7                 | 47.8                 | 50.6                 | 50.6                 | 50.9                 | 51.2                 | 51.2                 | 51.5                  | 51.5                  | 50.9                  | 51.3                  | 51.2                  |
| 6                  | 45.6                 | 45.3                 | 46.2                 | 44.8                 | 44.7                 | 44.8                 | 45.8                 | 45.2                 | 44.3                 | 45.3                  | 44.9                  | 44.8                  | 44.8                  | 44.8                  |
| 7                  | 56.2                 | 55.5                 | 56.7                 | 55.9                 | 54.9                 | 54.3                 | 55.2                 | 56.0                 | 54.2                 | 55.1                  | 55.6                  | 54.7                  | 55.3                  | 55.2                  |
| 8                  | 138.8                | 138.2                | 139.7                | 138.4                | 137.5                | 129.9                | 129.5                | 138.7                | 129.8                | 138.6                 | 138.1                 | 130.9                 | 129.8                 | 129.3                 |
| 9                  | 122.1                | 121.3                | 122.8                | 122.5                | 121.4                | 121.8                | 122.5                | 122.3                | 122.2                | 121.9                 | 121.6                 | 121.9                 | 122.6                 | 122.3                 |
| 10                 | 121.1                | 120.6                | 121.5                | 121.0                | 120.7                | 105.0                | 107.6                | 121.2                | 107.2                | 121.2                 | 120.5                 | 104.9                 | 107.9                 | 105.2                 |
| 11                 | 128.3                | 127.5                | 128.4                | 128.5                | 127.8                | 160.1                | 158.5                | 128.5                | 160.5                | 128.3                 | 127.9                 | 160.3                 | 157.6                 | 160.5                 |
| 12                 | 110.4                | 109.4                | 110.3                | 110.6                | 109.4                | 96.9                 | 98.9                 | 110.5                | 97.0                 | 110.1                 | 109.9                 | 96.9                  | 98.6                  | 97.2                  |
| 13                 | 144.5                | 143.3                | 144.5                | 144.4                | 143.0                | 144.2                | 145.5                | 144.5                | 144.3                | 143.7                 | 143.6                 | 144.7                 | 145.2                 | 144.8                 |
| 14                 | 126.2                | 22.8                 | 128.4                | 57.2                 | 54.0                 | 54.0                 | 54.2                 | 52.3                 | 52.4                 | 124.9                 | 127.8                 | 124.9                 | 127.8                 | 127.6                 |
| 15                 | 133.4                | 33.6                 | 132.8                | 59.1                 | 57.2                 | 57.3                 | 57.1                 | 56.1                 | 56.6                 | 133.8                 | 129.9                 | 133.5                 | 129.8                 | 129.8                 |
| 16                 | 92.4                 | 92.6                 | 90.9                 | 90.6                 | 90.6                 | 90.9                 | 90.8                 | 91.4                 | 91.3                 | 92.9                  | 91.9                  | 92.8                  | 92.2                  | 91.8                  |
| 17                 | 27.5                 | 26.2                 | 30.2                 | 24.3                 | 23.2                 | 23.2                 | 24.0                 | 24.6                 | 23.3                 | 28.8                  | 27.9                  | 26.9                  | 28.3                  | 27.8                  |
| 18                 | 7.6                  | 7.4                  | 8.0                  | 7.5                  | 7.2                  | 7.2                  | 7.4                  | 7.2                  | 8.7                  | 17.9                  | 14.9                  | 7.8                   | 16.1                  | 15.2                  |
| 19                 | 29.4                 | 29.3                 | 31.7                 | 25.2                 | 24.4                 | 24.4                 | 25.0                 | 27.1                 | 26.4                 | 66.8                  | 67.2                  | 28.6                  | 67.3                  | 66.8                  |
| 20                 | 42.0                 | 38.6                 | 38.5                 | 41.7                 | 41.0                 | 41.1                 | 41.8                 | 37.8                 | 37.5                 | 48.1                  | 46.6                  | 41.7                  | 46.4                  | 46.2                  |
| 21                 | 70.6                 | 72.6                 | 65.2                 | 63.4                 | 67.6                 | 67.7                 | 68.6                 | 71.4                 | 71.2                 | 68.5                  | 71.3                  | 70.6                  | 70.8                  | 70.5                  |
| CO <sub>2</sub> Me | 168.0                | 169.3                | 168.6                | 168.3                | 168.9                | 168.9                | 168.6                | 168.6                | 169.2                | 169.6                 | 169.6                 | 169.6                 | 169.2                 | 169.1                 |
|                    | 50.9                 | 51.2                 | 50.9                 | 51.2                 | 51.1                 | 51.1                 | 50.9                 | 50.9                 | 51.4                 | 51.3                  | 51.6                  | 51.5                  | 51.5                  | 51.4                  |
| 11-OMe             | -                    | -                    | -                    | -                    | -                    | 55.5                 | -                    | -                    | 56.0                 | -                     | -                     | 55.8                  | -                     | 56.0                  |

|                                   |   |   |       |       |   |   |   |   |   |   |       |   |       |       |
|-----------------------------------|---|---|-------|-------|---|---|---|---|---|---|-------|---|-------|-------|
| 19-OAc                            | - | - | -     | -     | - | - | - | - | - | - | 171.8 | - | 171.9 | 171.5 |
|                                   | - | - | -     | -     | - | - | - | - | - | - | 21.5  | - | 21.5  | 21.3  |
| CH <sub>2</sub> COCH <sub>3</sub> | - | - | 43.7  | 37.8  | - | - | - | - | - | - | -     | - | -     | -     |
|                                   | - | - | 207.3 | 207.7 | - | - | - | - | - | - | -     | - | -     | -     |
|                                   | - | - | 30.1  | 30.4  | - | - | - | - | - | - | -     | - | -     | -     |

<sup>a</sup>125 MHz, acetone-*d*<sub>6</sub>; <sup>b</sup>125 MHz, CDCl<sub>3</sub>; <sup>c</sup>100 MHz, acetone-*d*<sub>6</sub>.

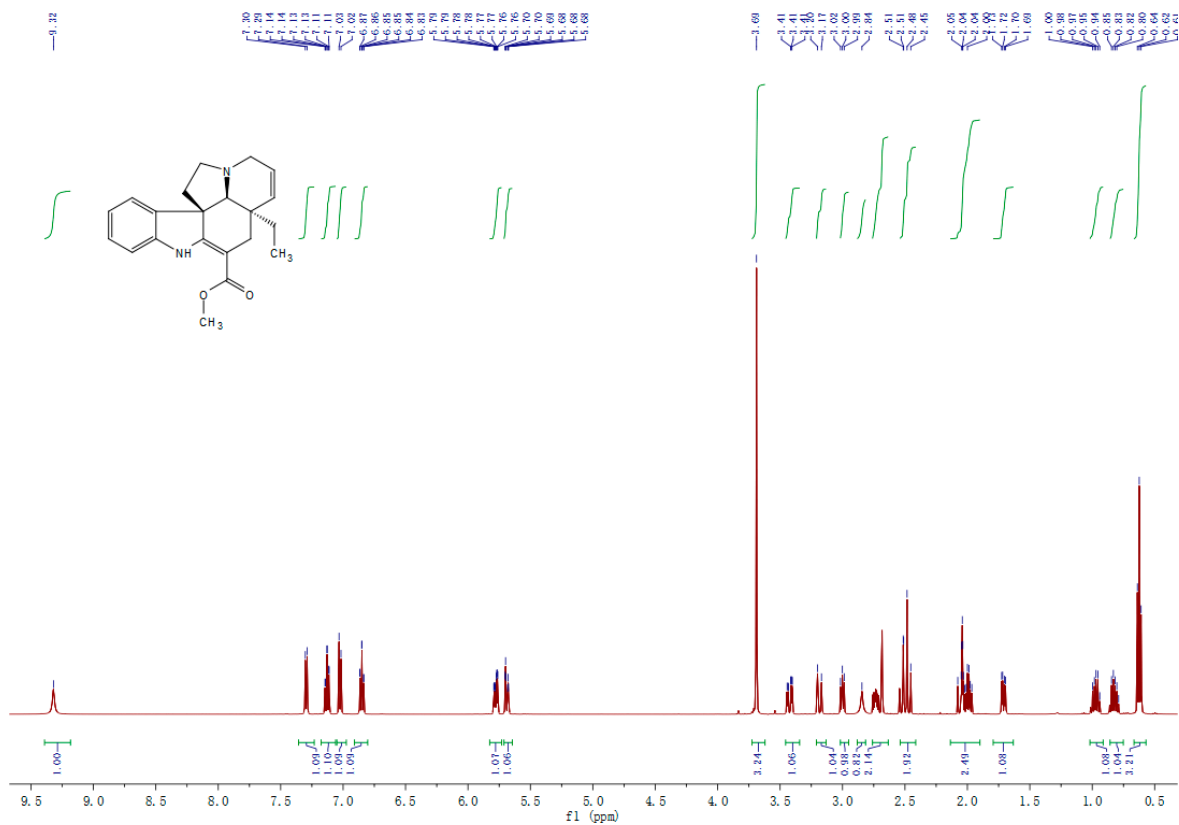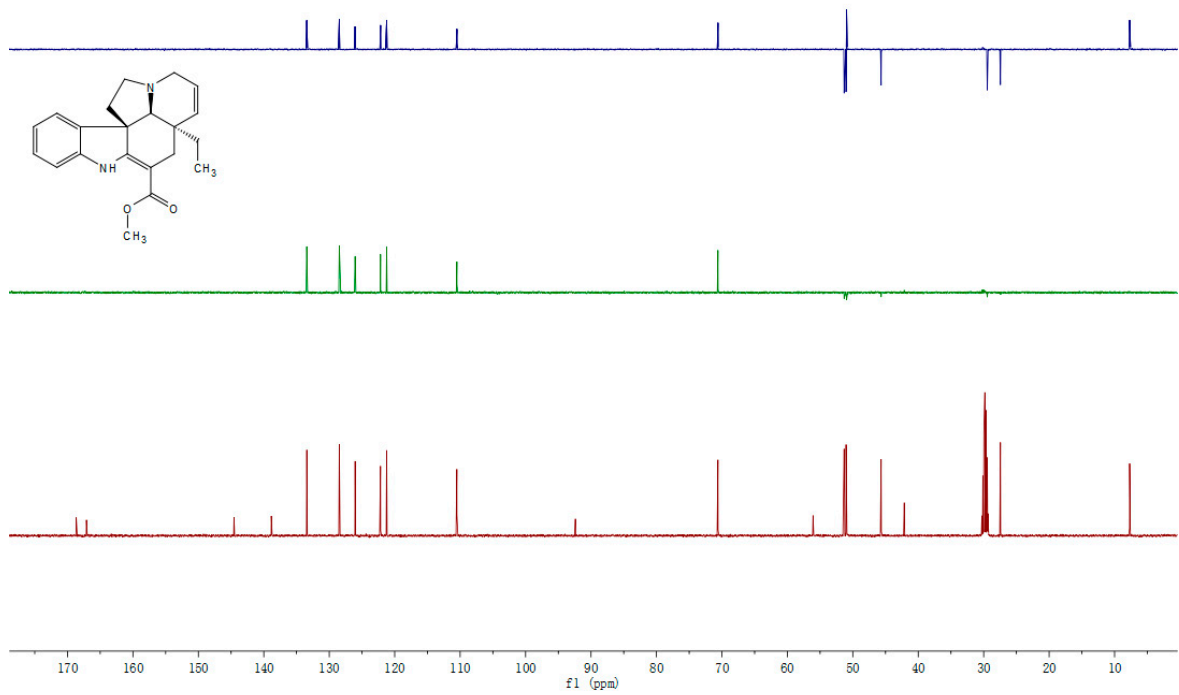

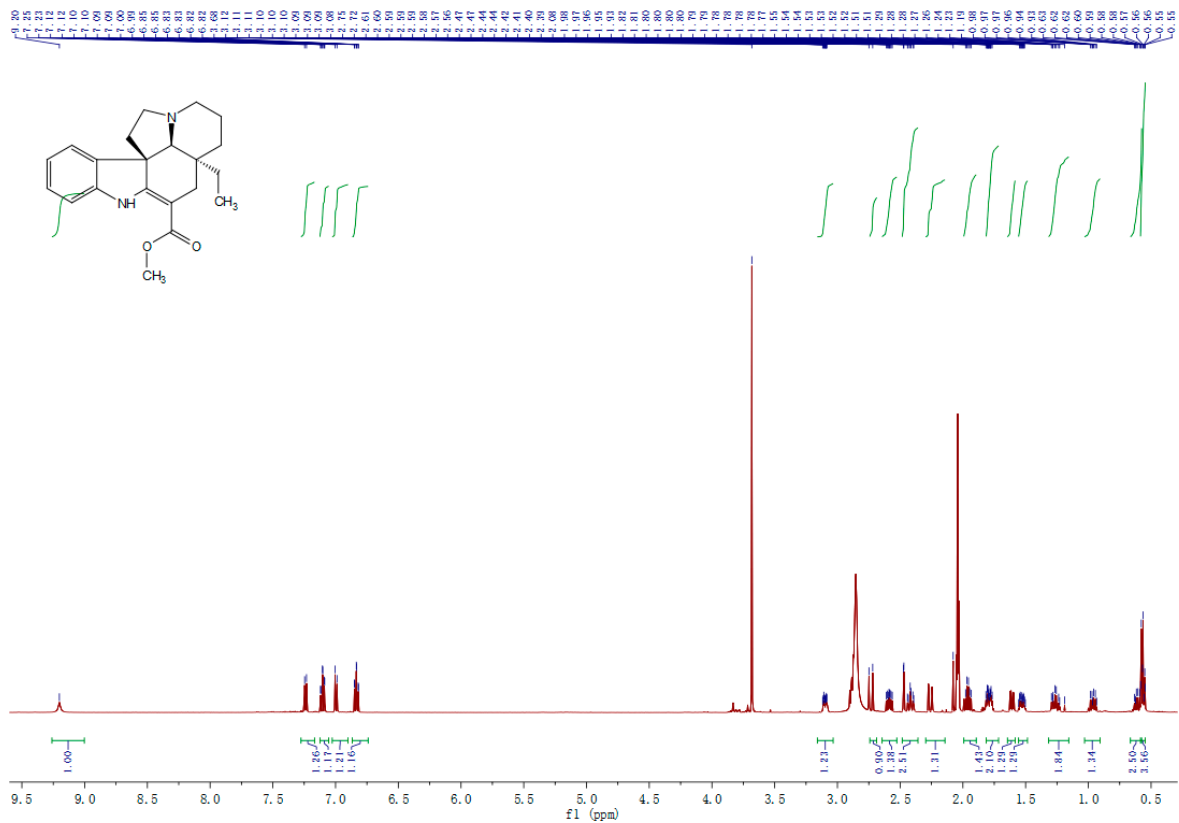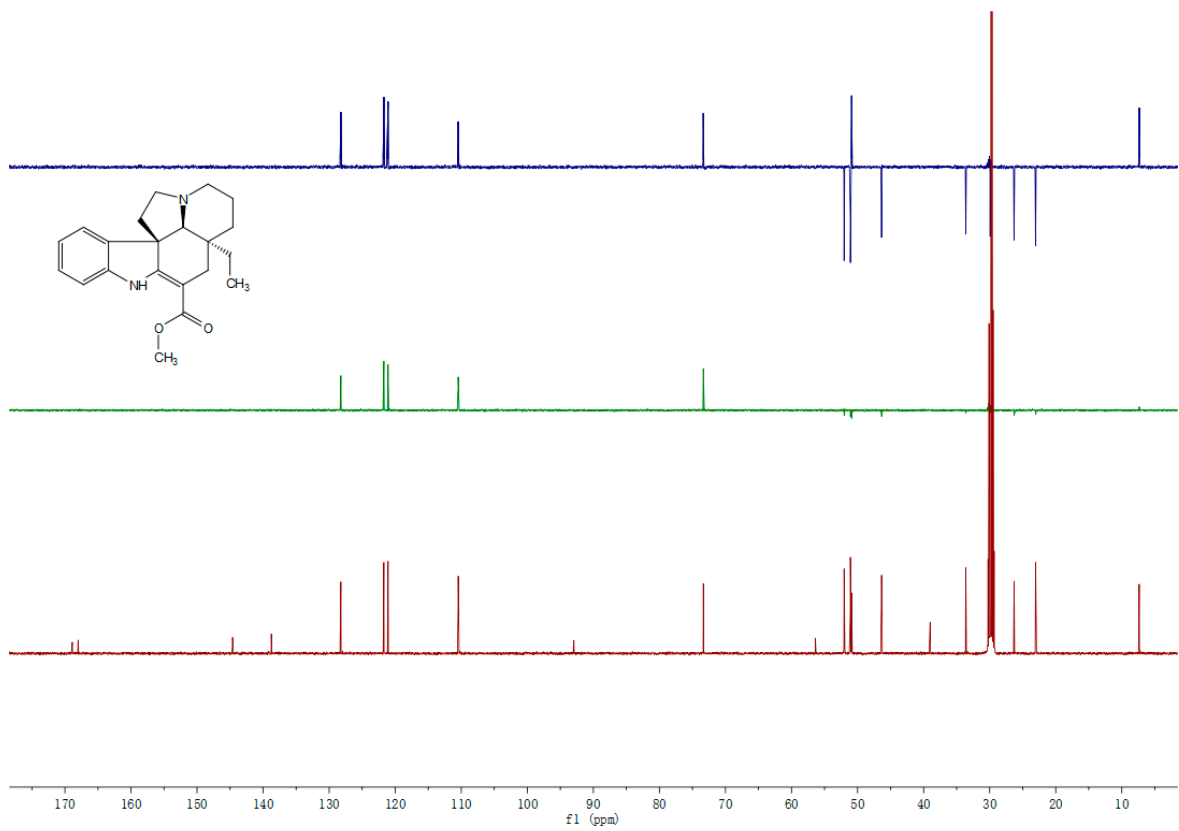

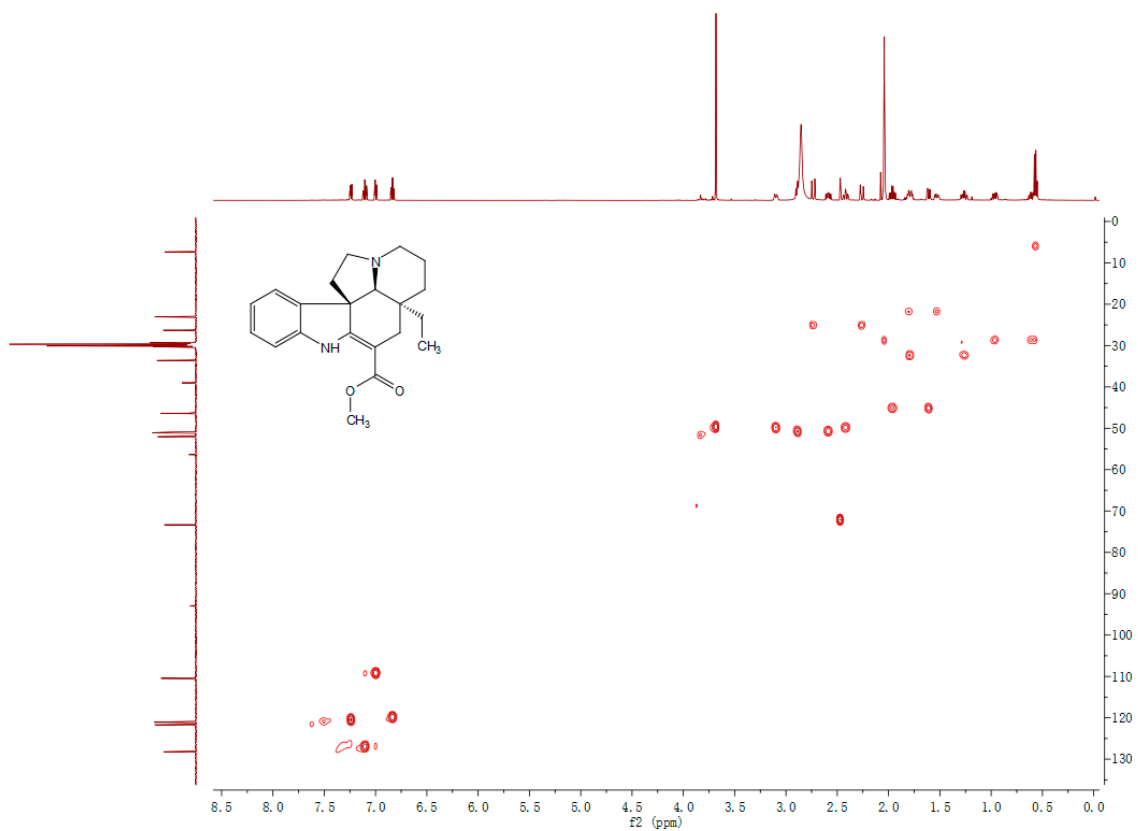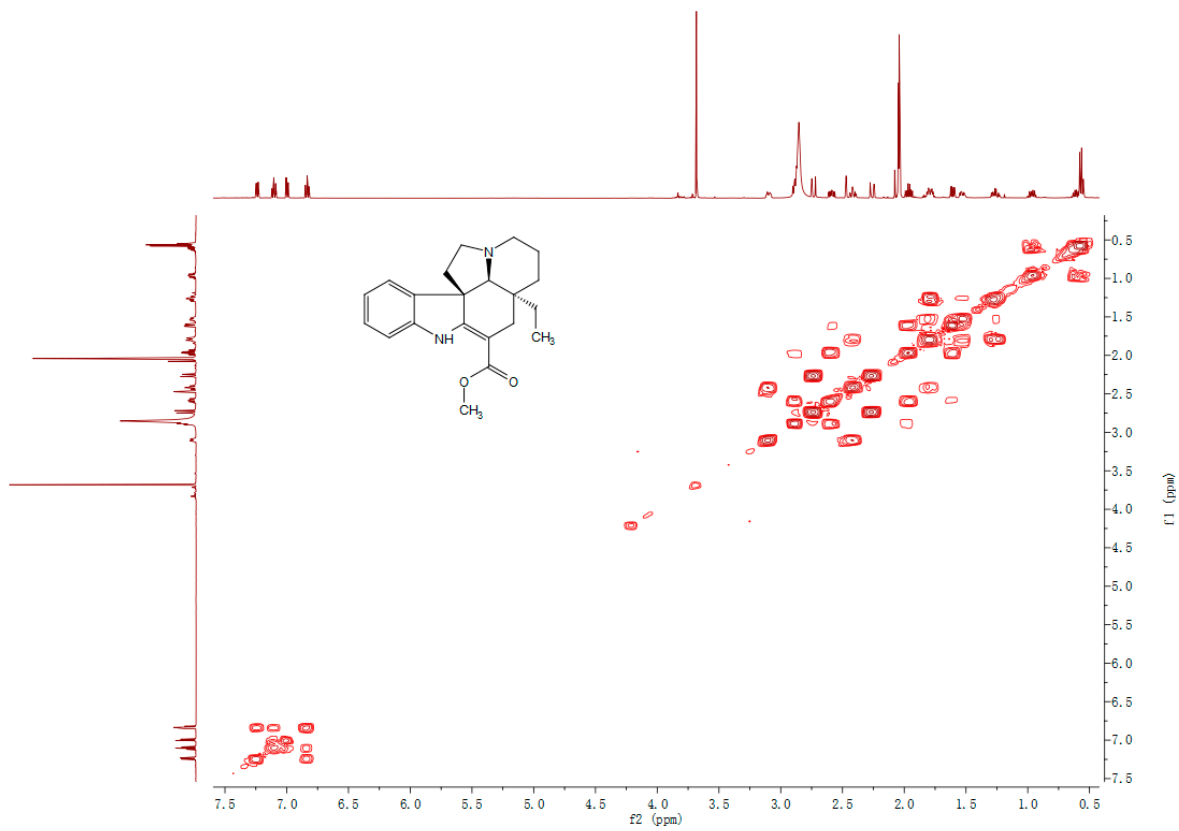

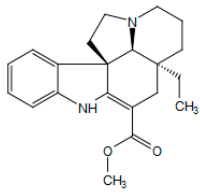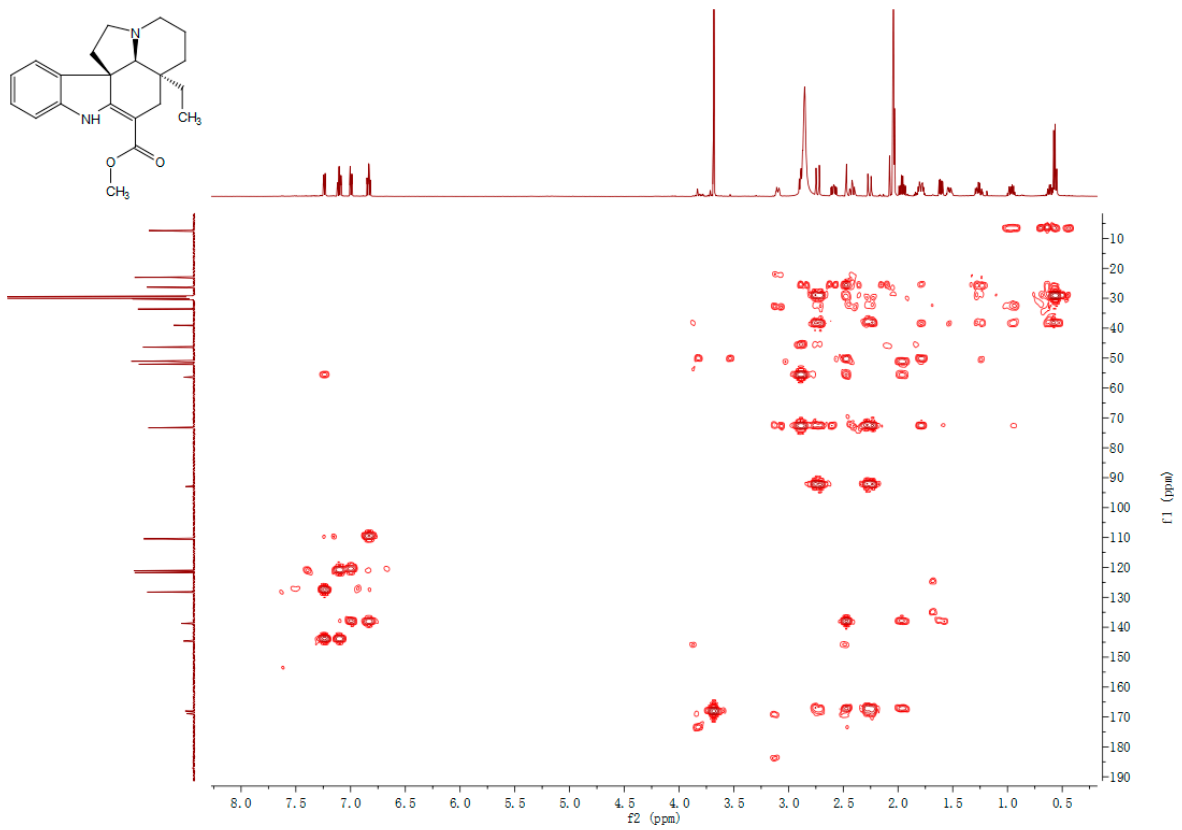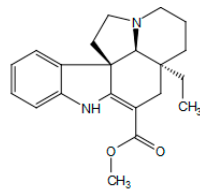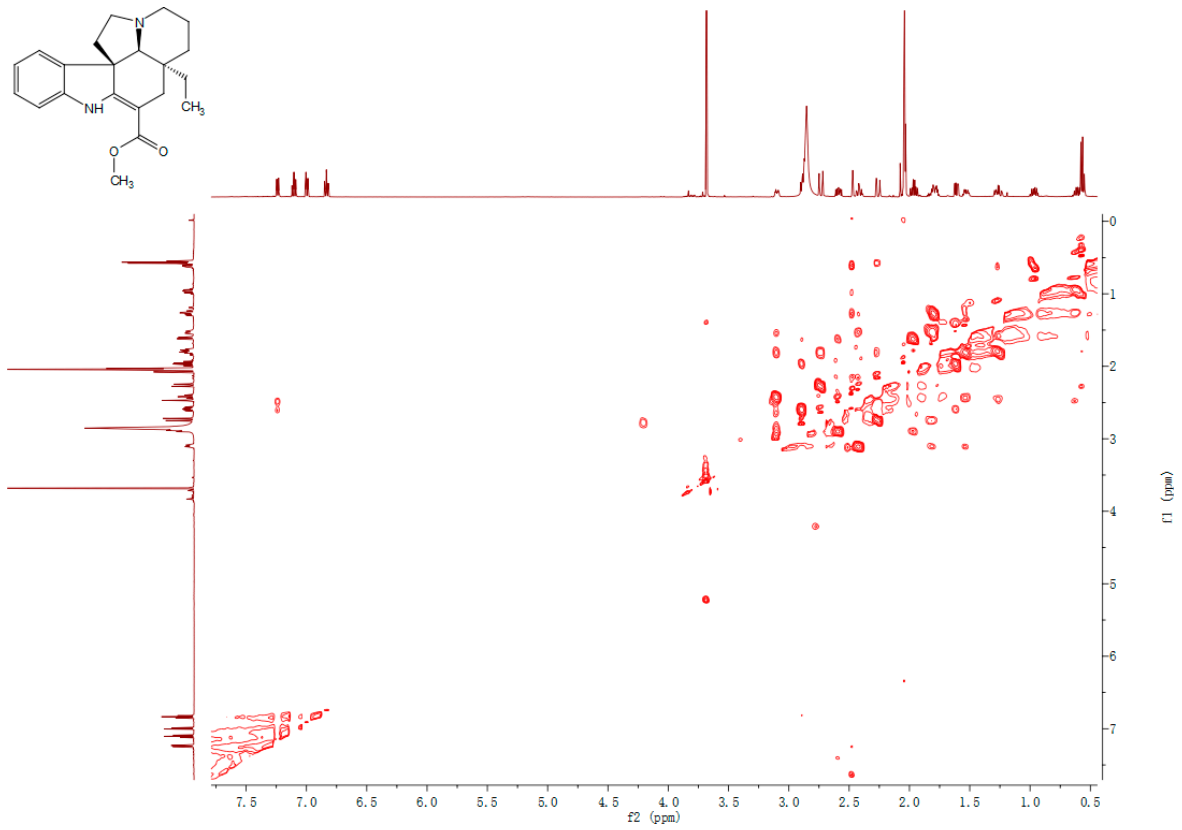

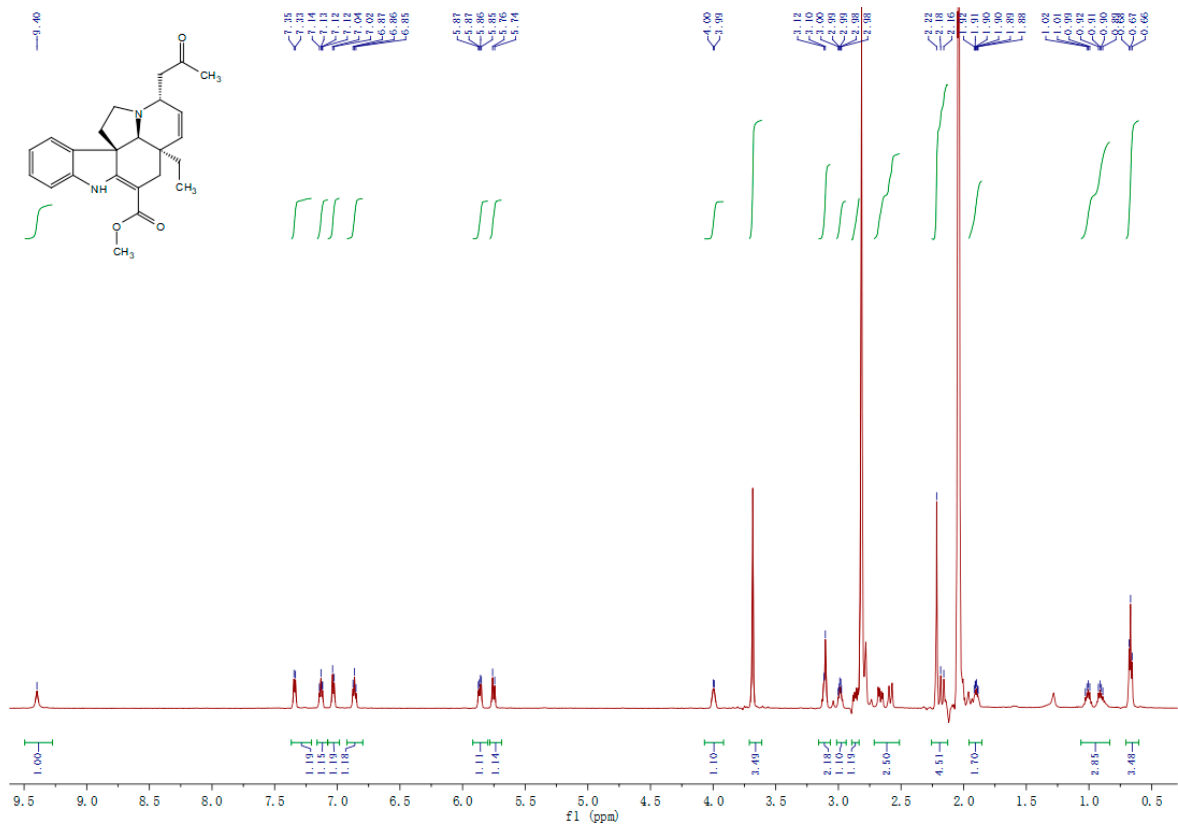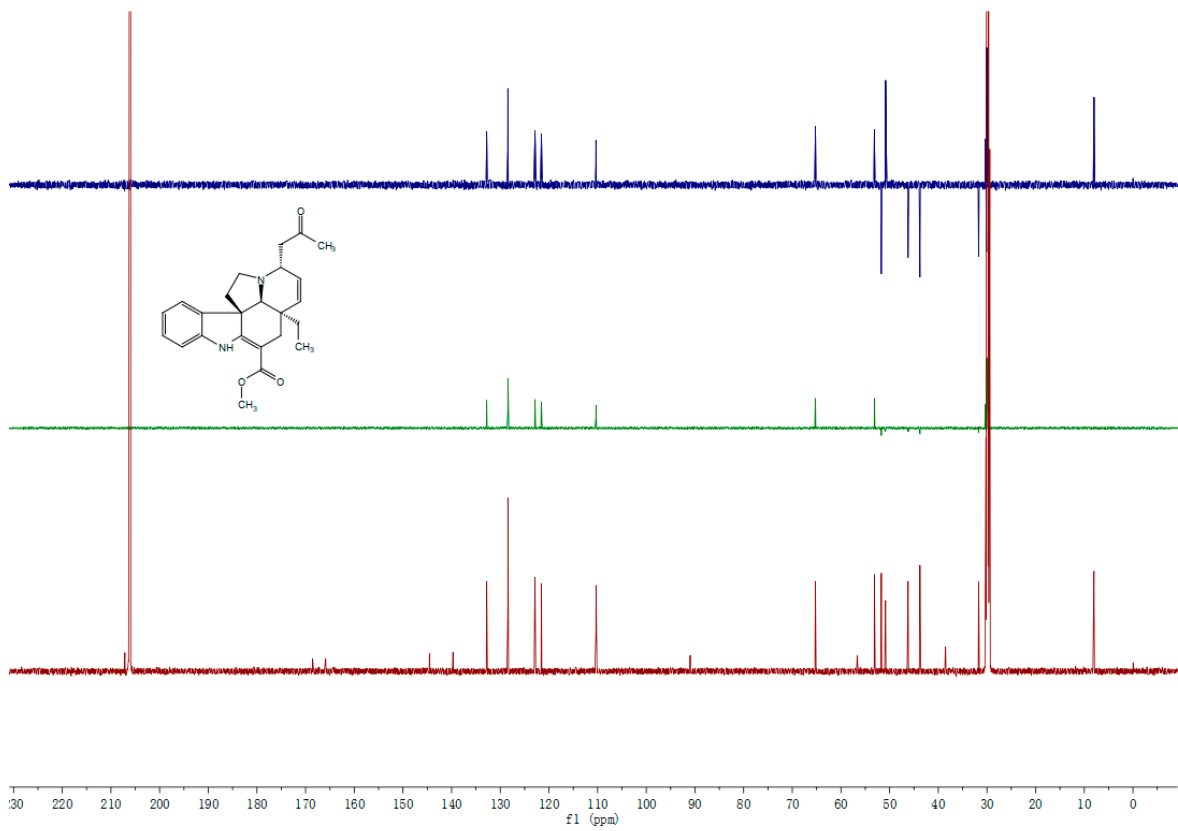

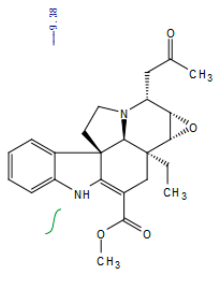

7.24  
7.18  
7.14  
7.07  
7.05  
6.97  
6.85

4.10  
4.09  
4.07  
4.06  
3.99  
3.98  
3.97  
3.96  
3.94  
3.91  
3.90  
3.87  
3.86  
3.84  
3.81  
3.76  
3.75  
3.74  
3.71  
3.70  
3.69  
3.67  
3.65  
3.64  
3.63  
3.61  
3.59  
3.58  
3.56  
3.54  
3.53  
3.51  
3.49  
3.48  
3.46  
3.44  
3.43  
3.41  
3.39  
3.38  
3.36  
3.34  
3.33  
3.31  
3.29  
3.28  
3.26  
3.24  
3.23  
3.21  
3.19  
3.18  
3.16  
3.14  
3.13  
3.11  
3.09  
3.08  
3.06  
3.04  
3.03  
3.01  
2.99  
2.98  
2.96  
2.94  
2.93  
2.91  
2.89  
2.88  
2.86  
2.84  
2.83  
2.81  
2.79  
2.78  
2.76  
2.74  
2.73  
2.71  
2.69  
2.68  
2.66  
2.64  
2.63  
2.61  
2.59  
2.58  
2.56  
2.54  
2.53  
2.51  
2.49  
2.48  
2.46  
2.44  
2.43  
2.41  
2.39  
2.38  
2.36  
2.34  
2.33  
2.31  
2.29  
2.28  
2.26  
2.24  
2.23  
2.21  
2.19  
2.18  
2.16  
2.14  
2.13  
2.11  
2.09  
2.08  
2.06  
2.04  
2.03  
2.01  
1.99  
1.98  
1.96  
1.94  
1.93  
1.91  
1.89  
1.88  
1.86  
1.84  
1.83  
1.81  
1.79  
1.78  
1.76  
1.74  
1.73  
1.71  
1.69  
1.68  
1.66  
1.64  
1.63  
1.61  
1.59  
1.58  
1.56  
1.54  
1.53  
1.51  
1.49  
1.48  
1.46  
1.44  
1.43  
1.41  
1.39  
1.38  
1.36  
1.34  
1.33  
1.31  
1.29  
1.28  
1.26  
1.24  
1.23  
1.21  
1.19  
1.18  
1.16  
1.14  
1.13  
1.11  
1.09  
1.08  
1.06  
1.04  
1.03  
1.01  
0.99  
0.98  
0.96  
0.94  
0.93  
0.91  
0.89  
0.88  
0.86  
0.84  
0.83  
0.81  
0.79  
0.78  
0.76  
0.74  
0.73  
0.71  
0.69  
0.68  
0.66  
0.64  
0.63  
0.61  
0.59  
0.58  
0.56  
0.54  
0.53  
0.51  
0.49  
0.48  
0.46  
0.44  
0.43  
0.41  
0.39  
0.38  
0.36  
0.34  
0.33  
0.31  
0.29  
0.28  
0.26  
0.24  
0.23  
0.21  
0.19  
0.18  
0.16  
0.14  
0.13  
0.11  
0.09  
0.08  
0.06  
0.04  
0.03  
0.01  
0.00

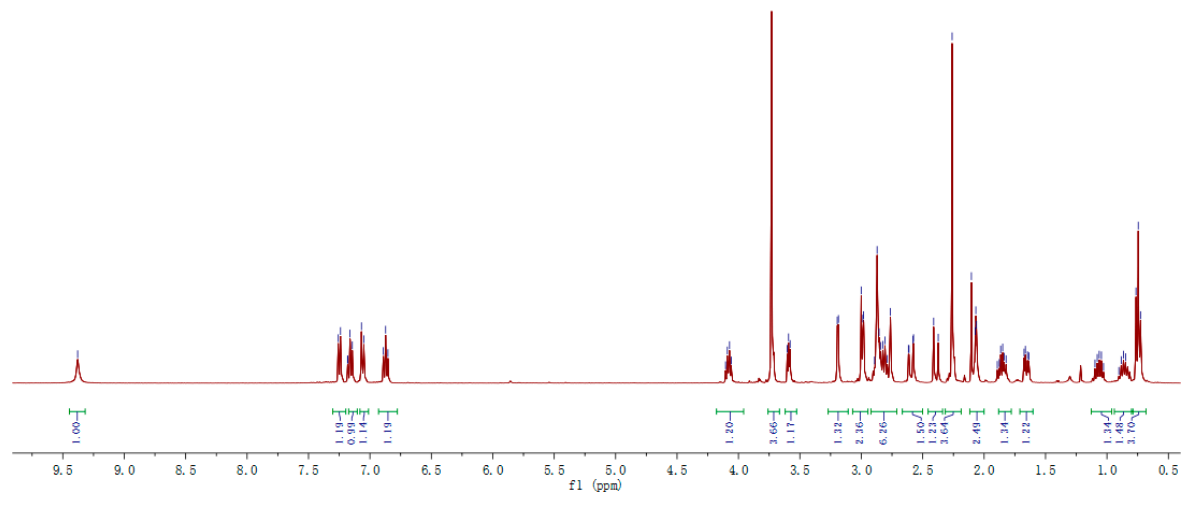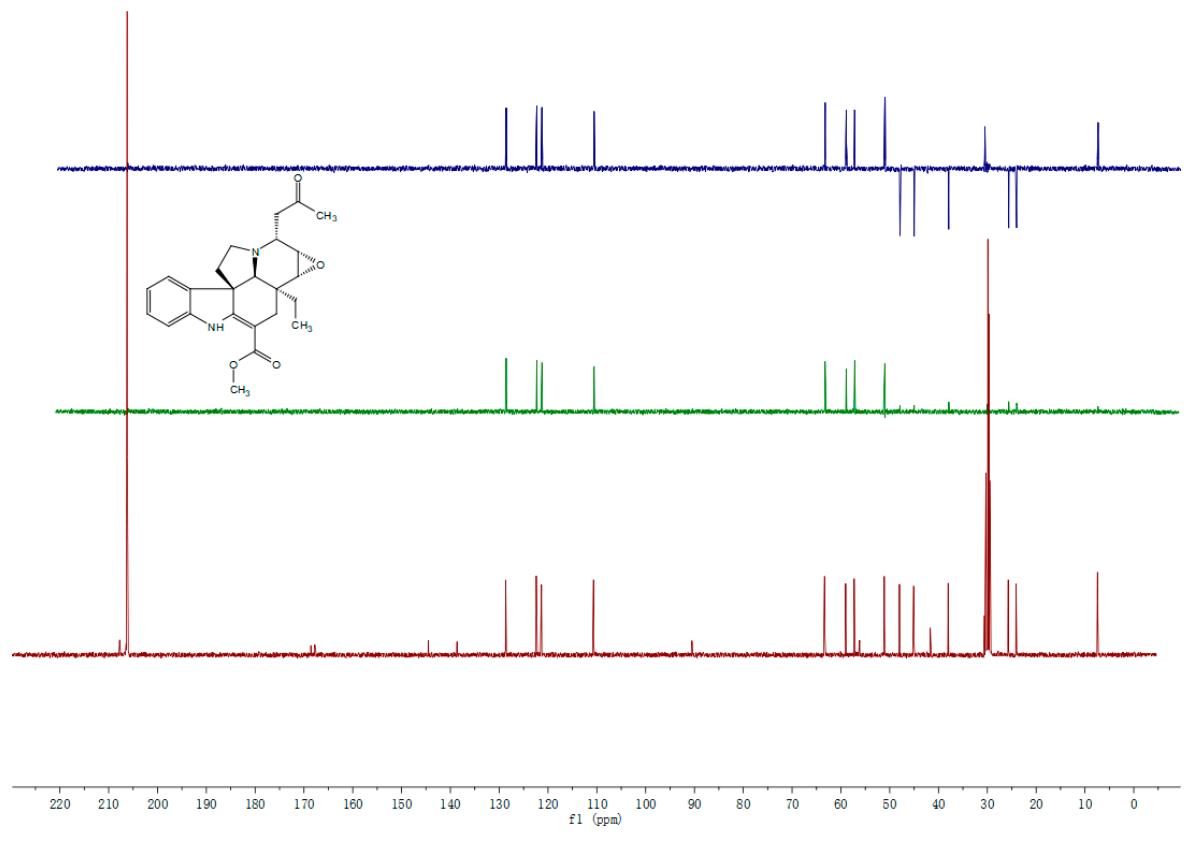



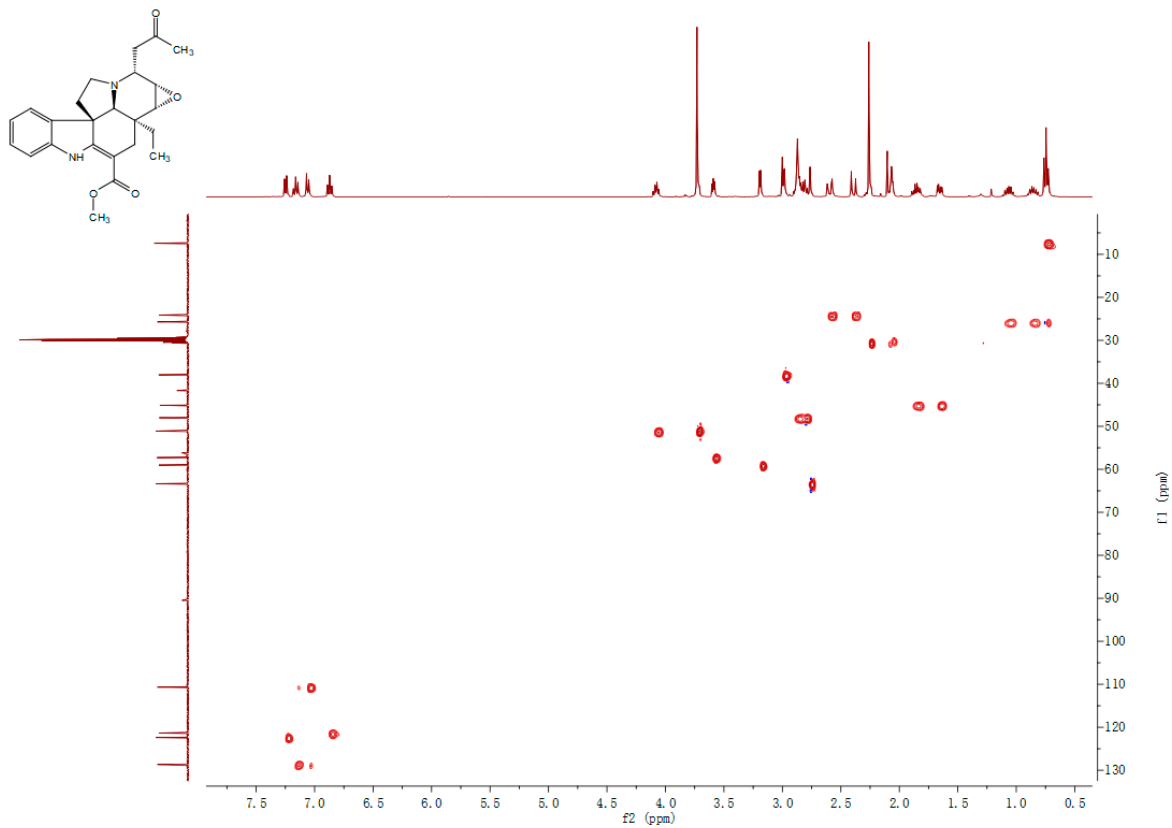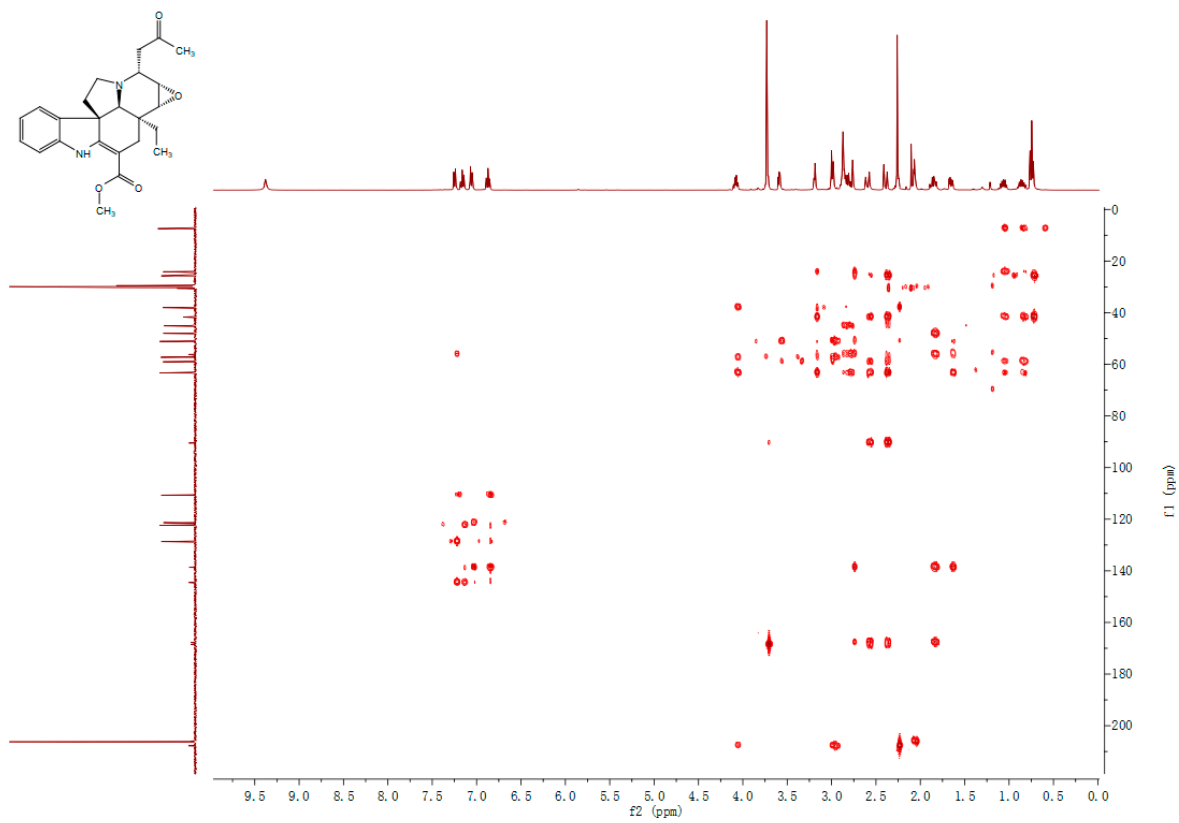

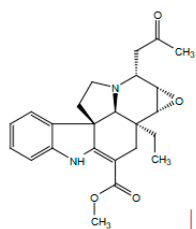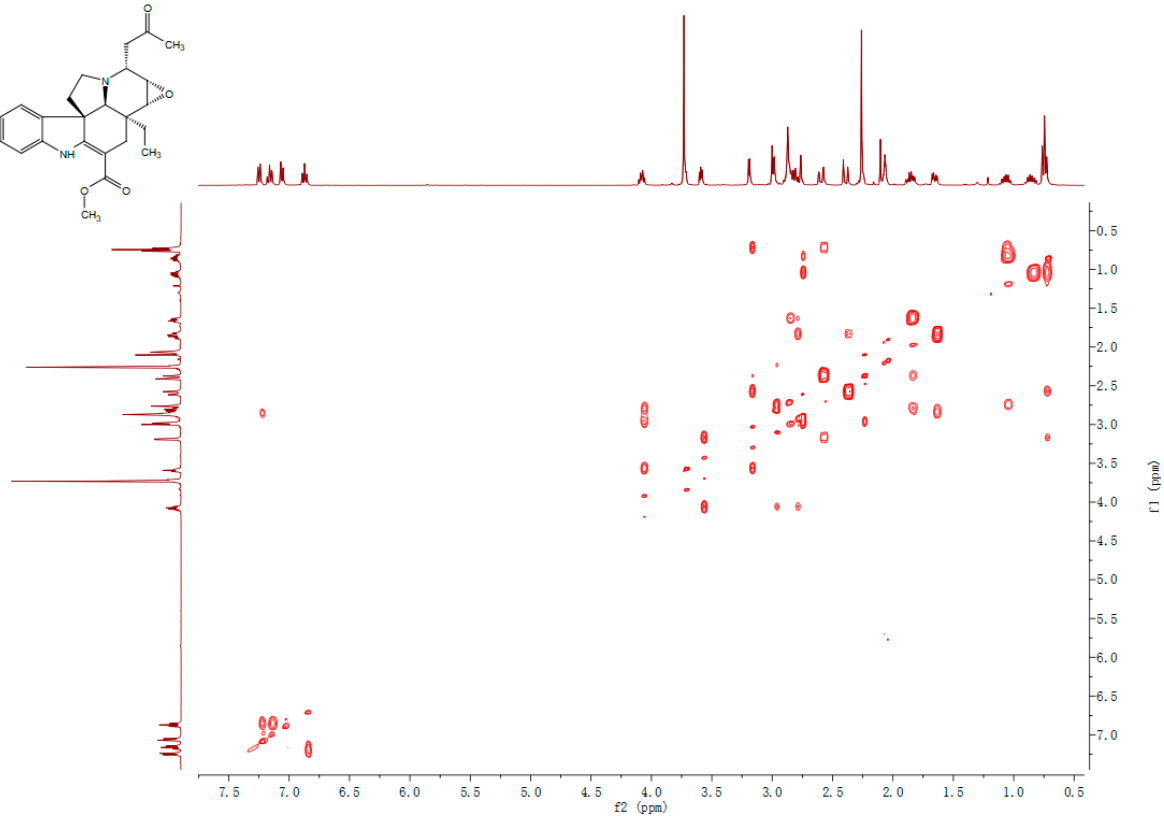

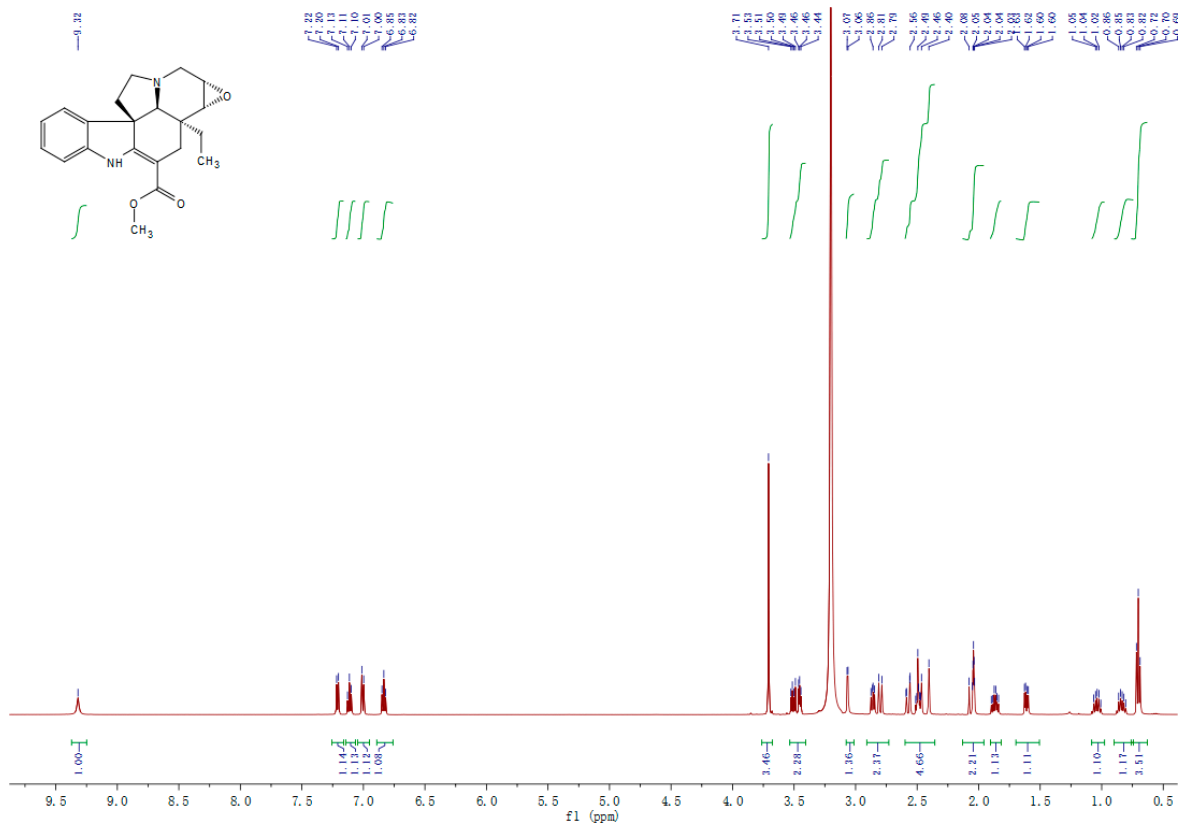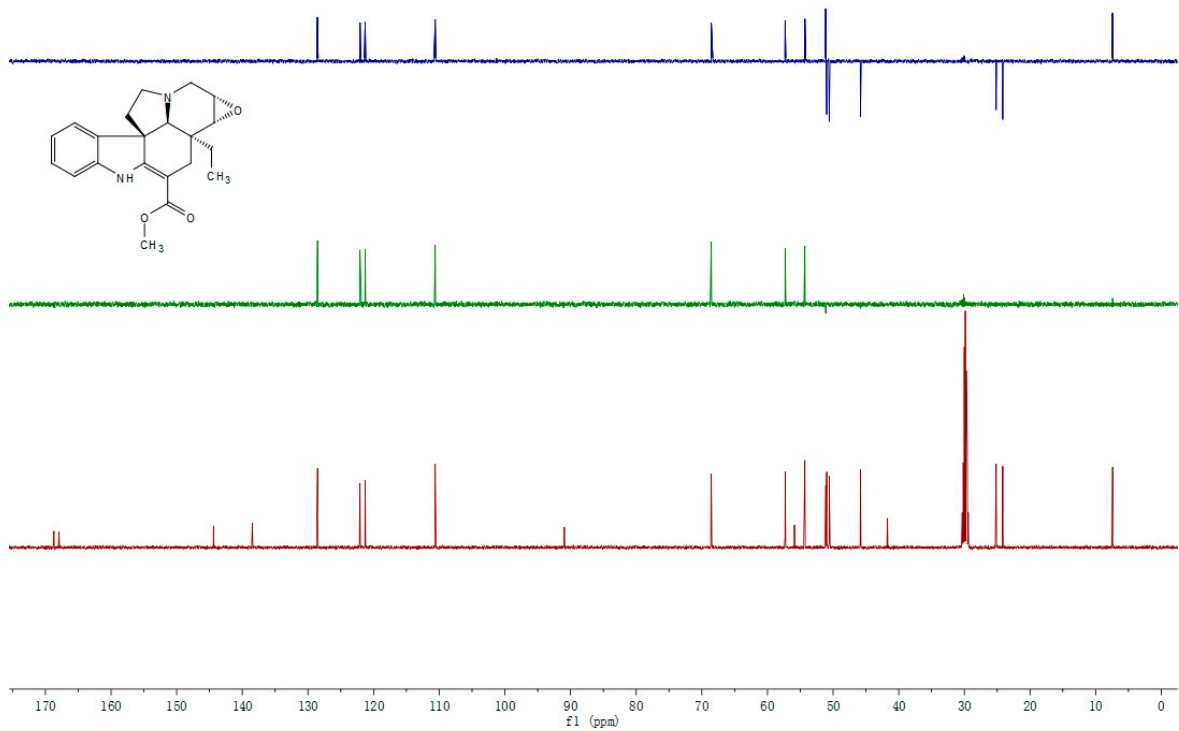

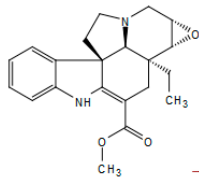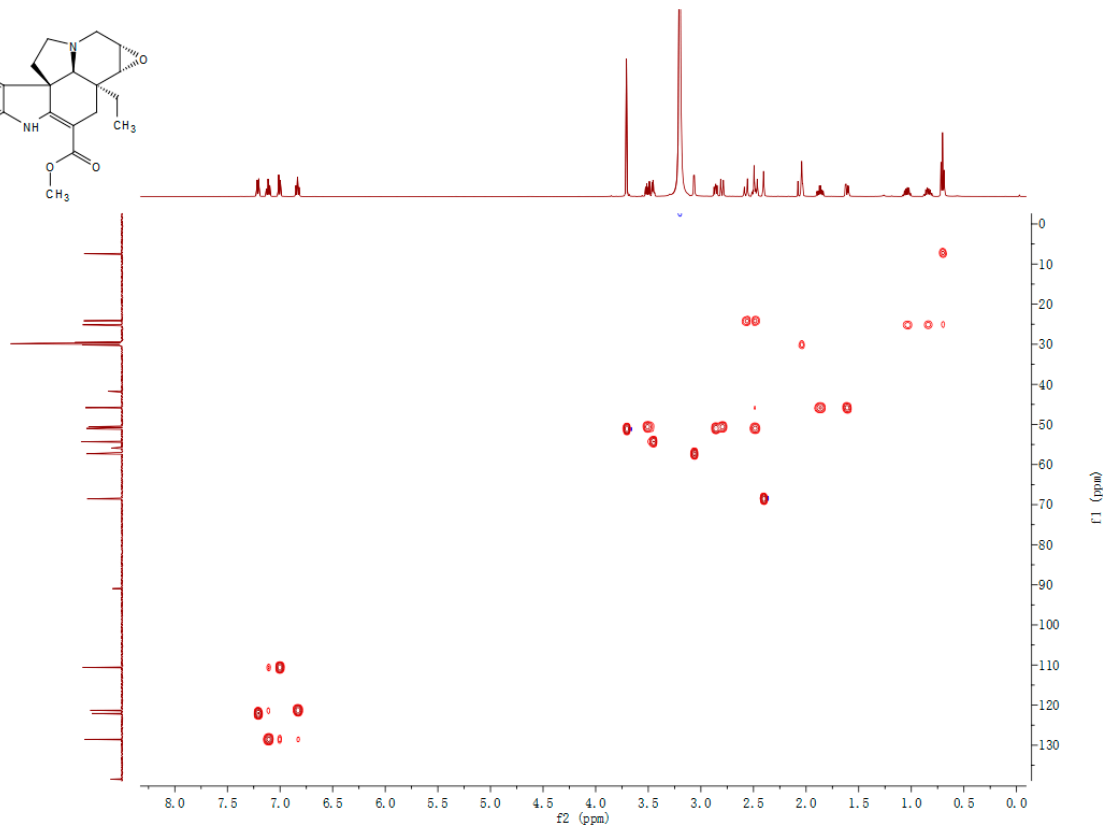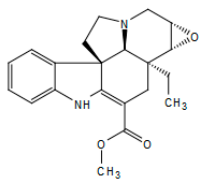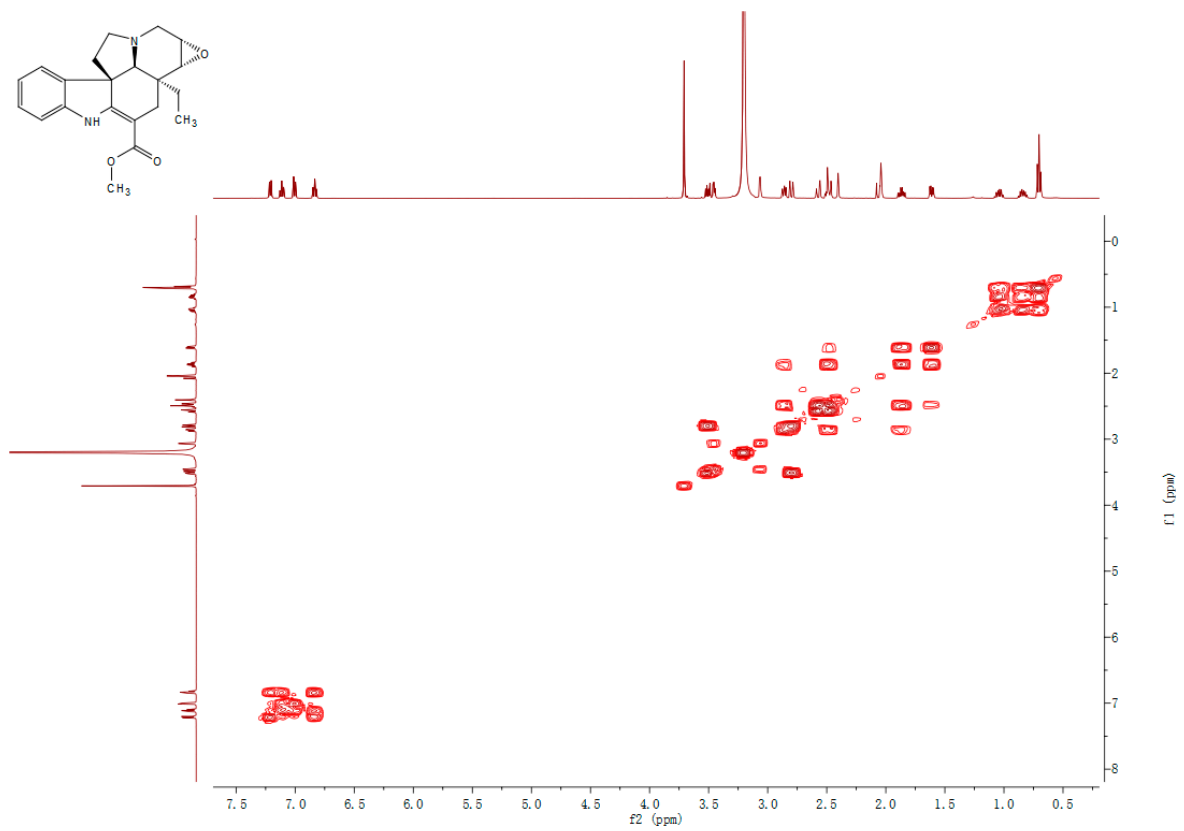

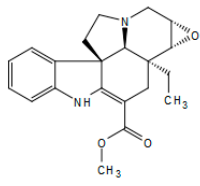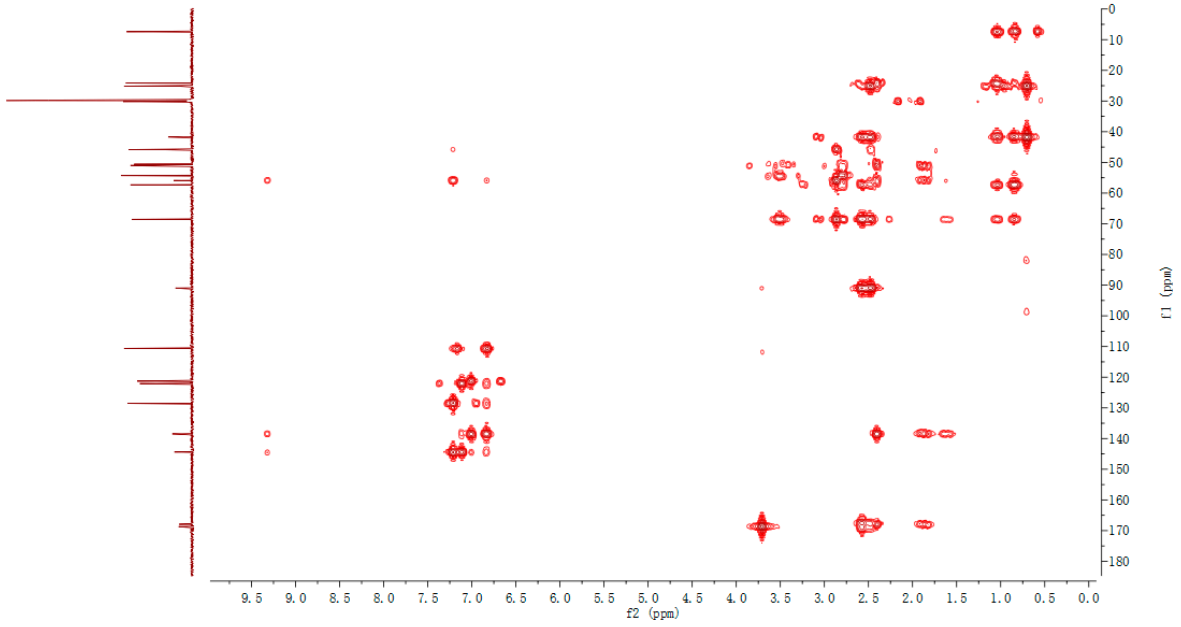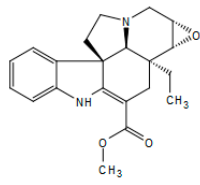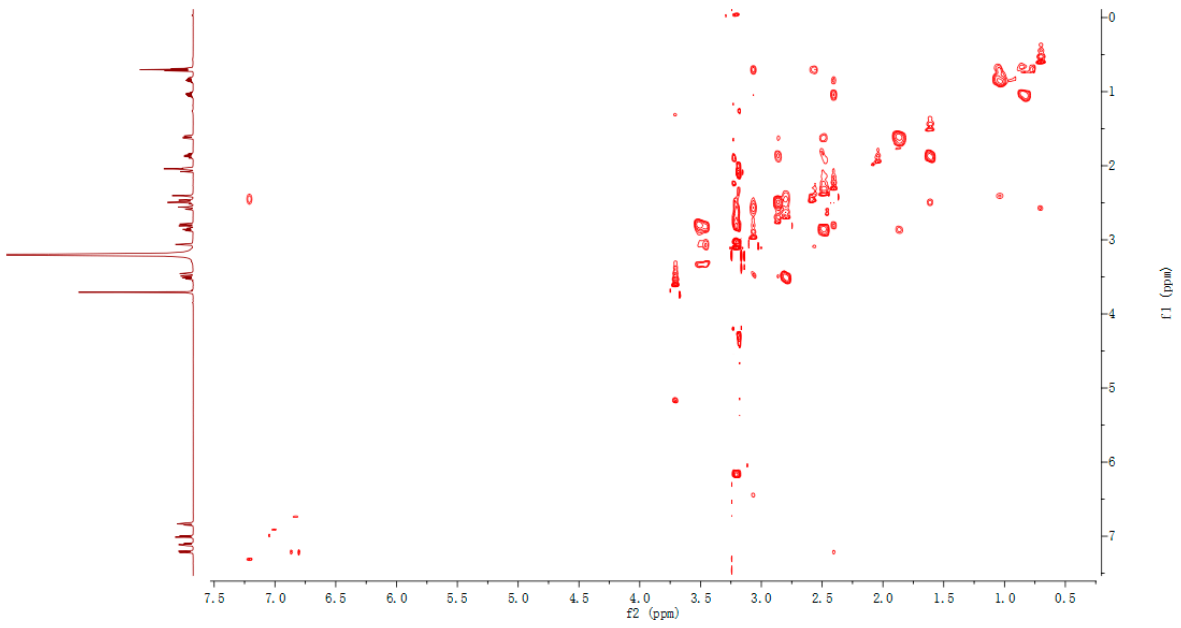

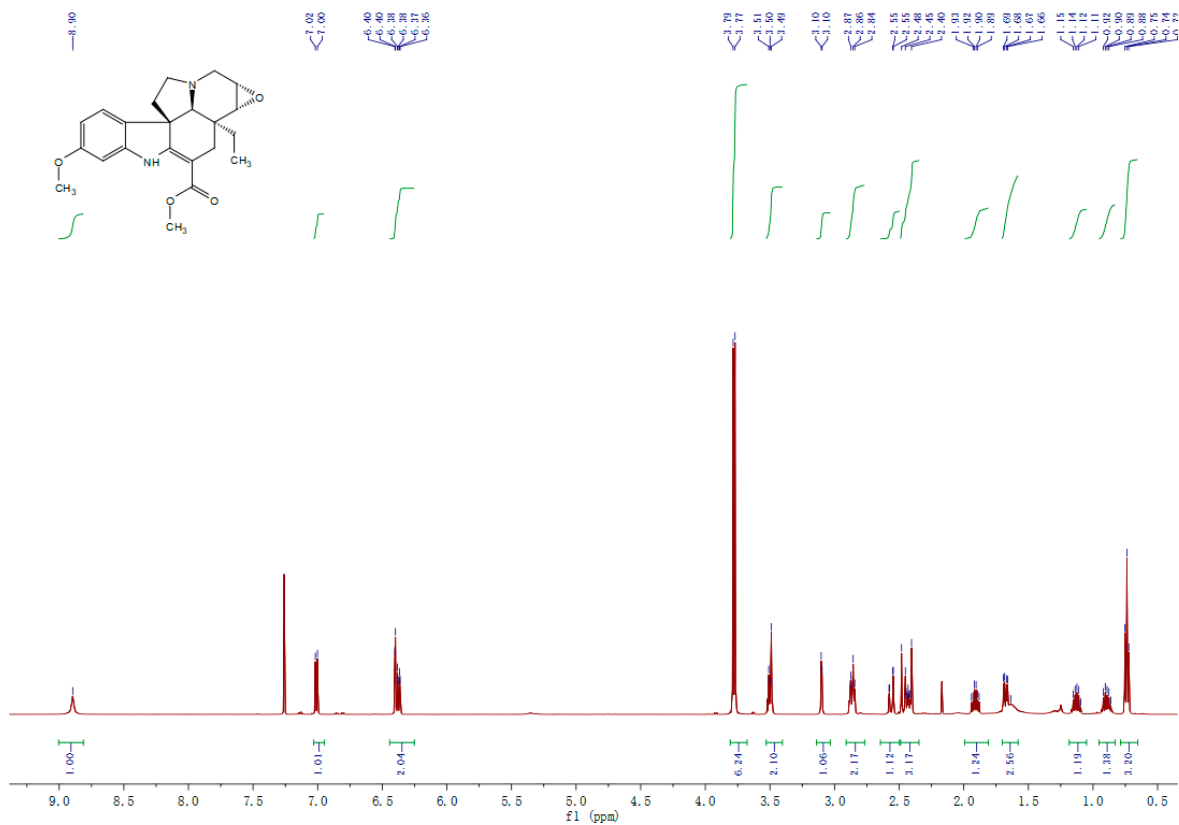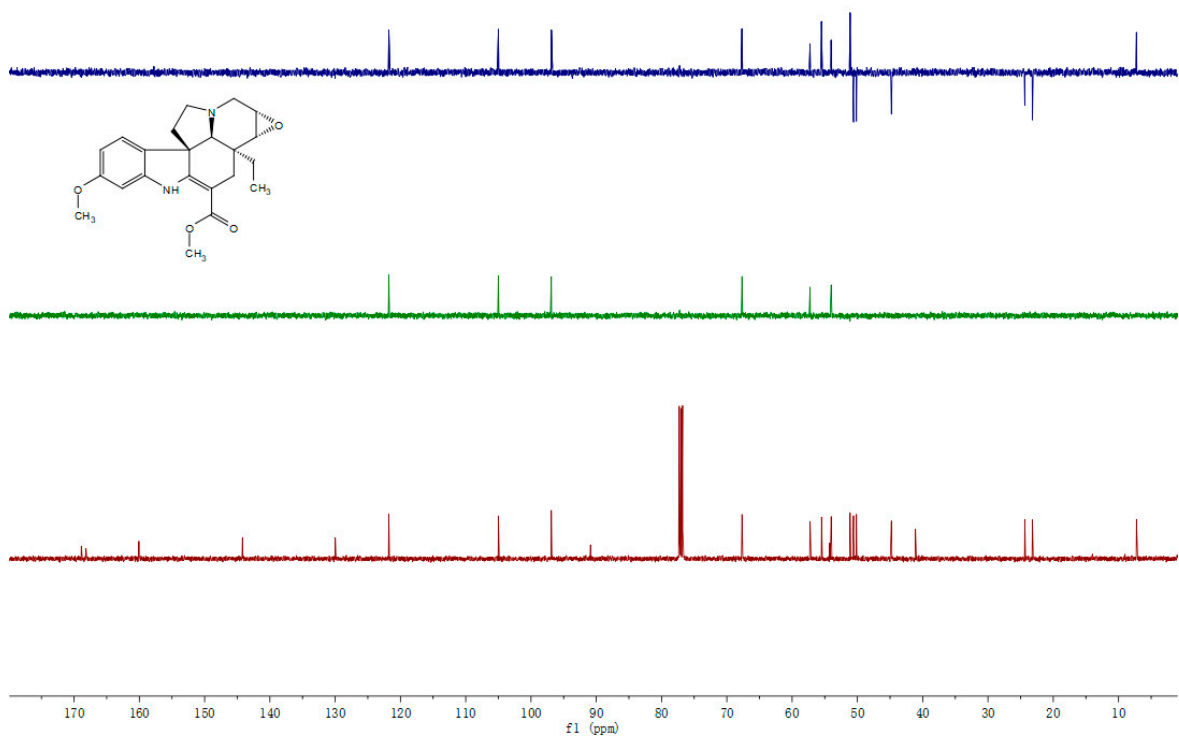

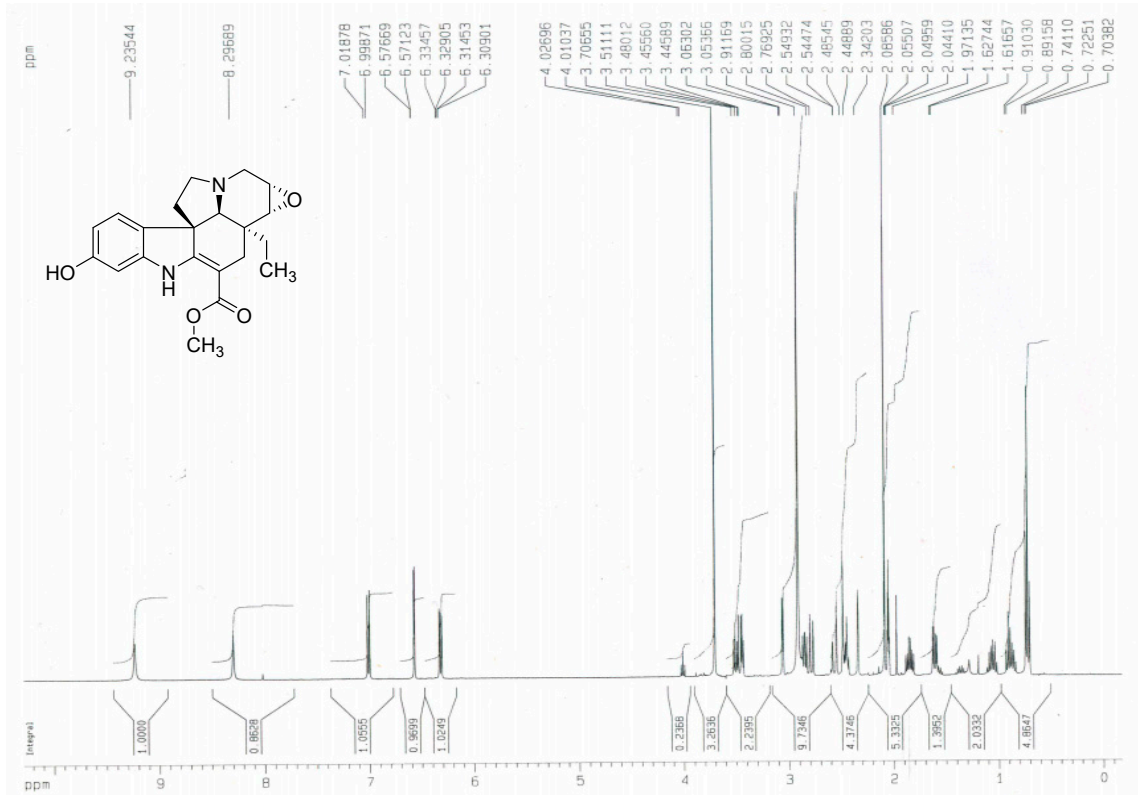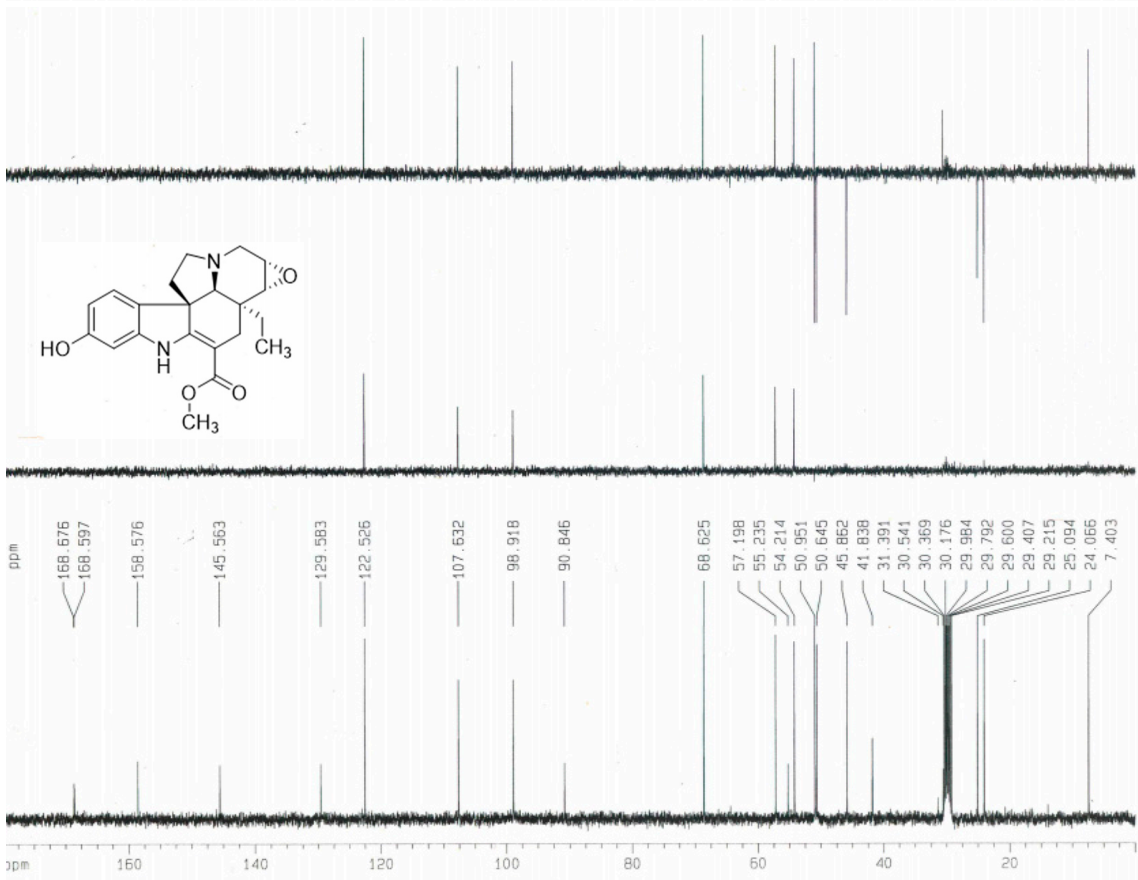

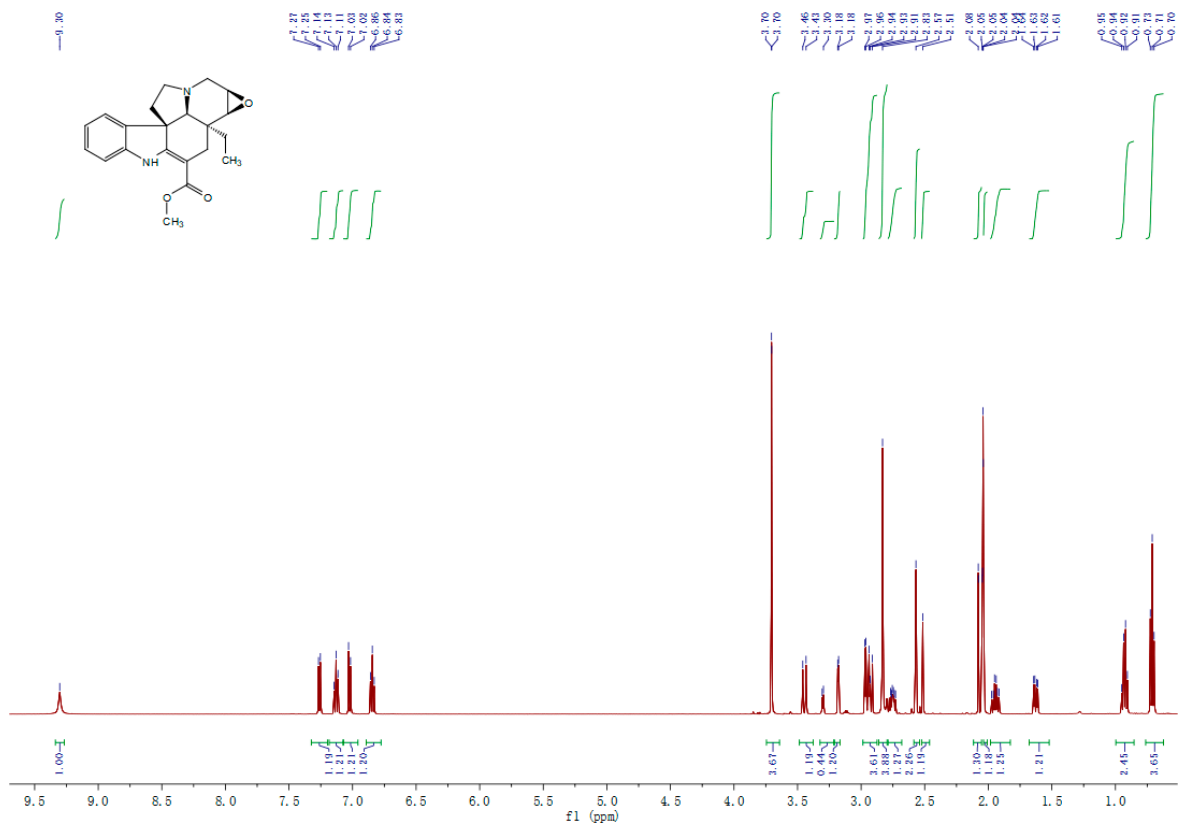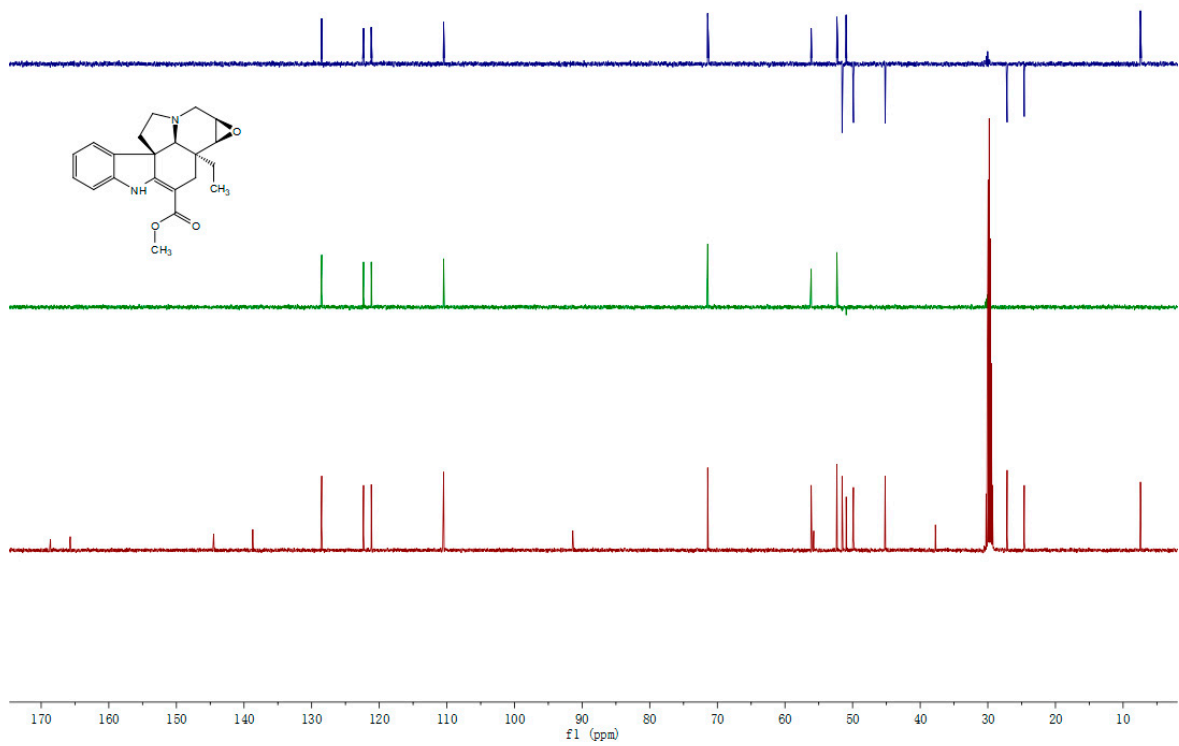



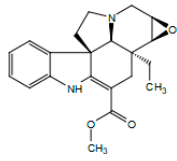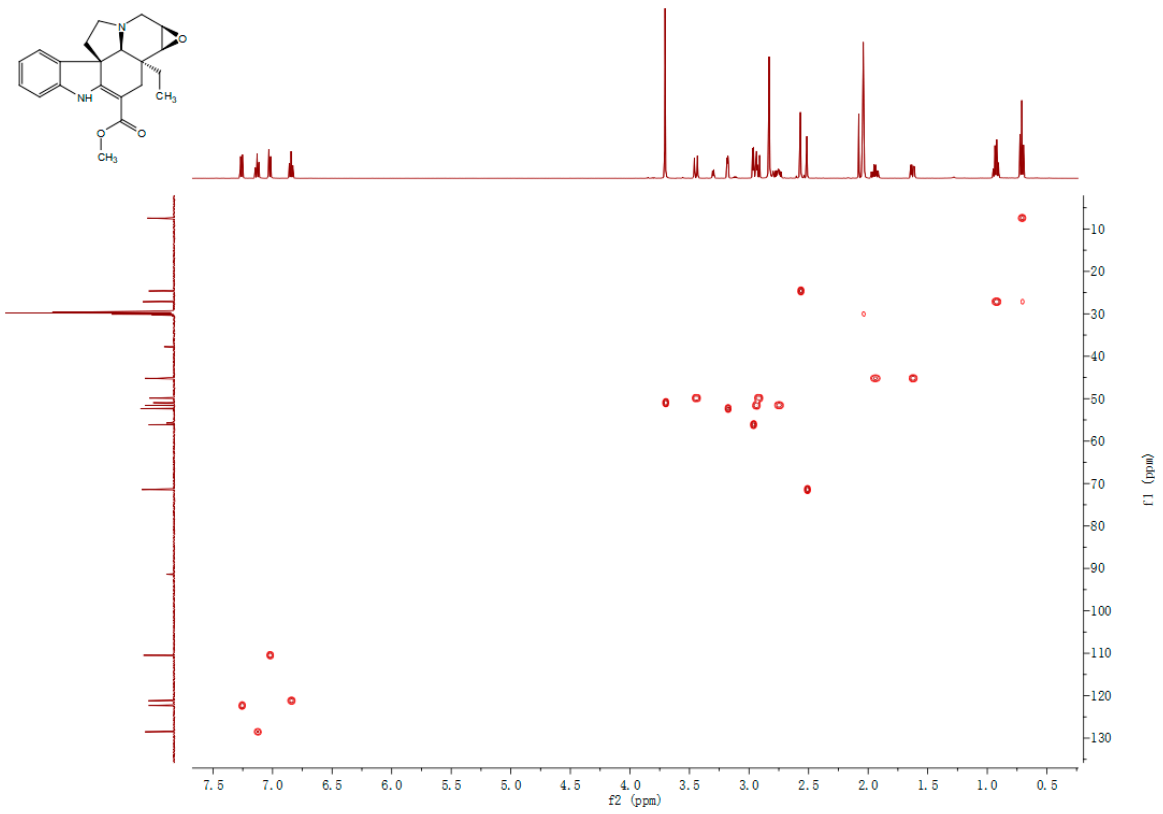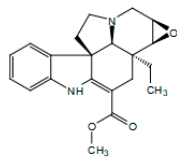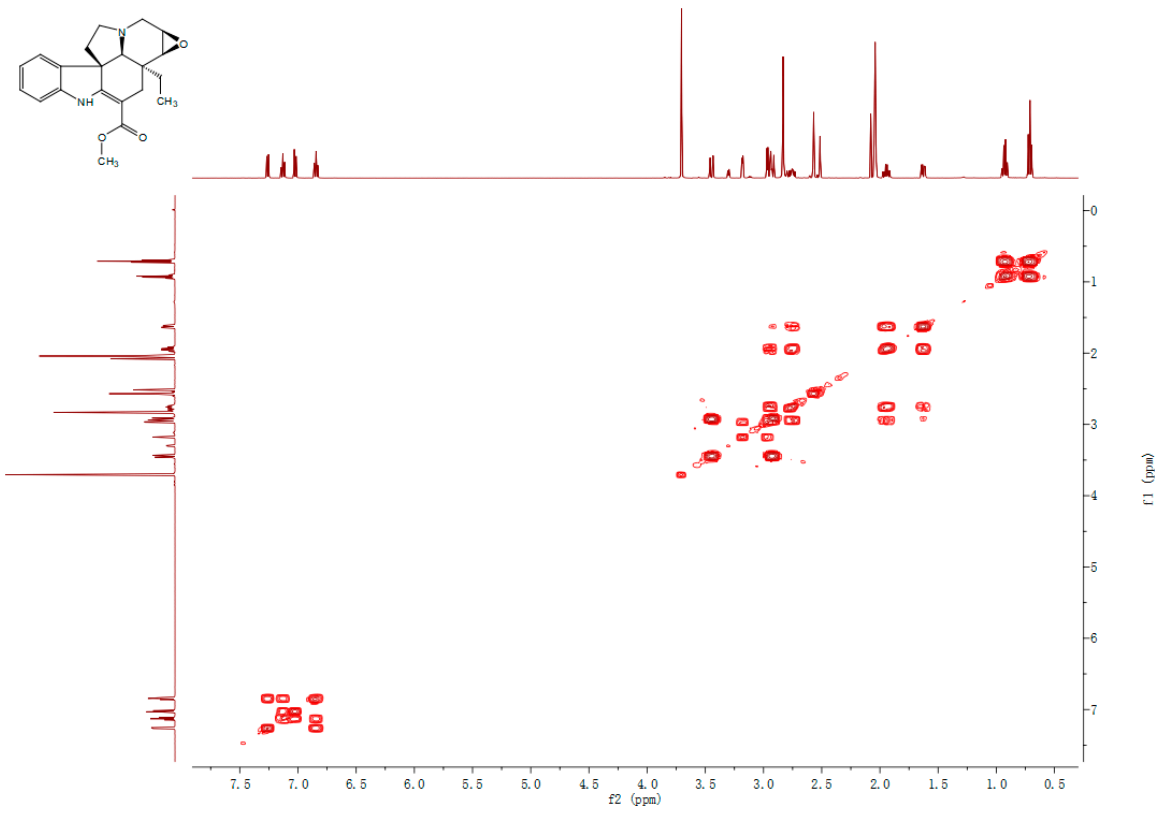

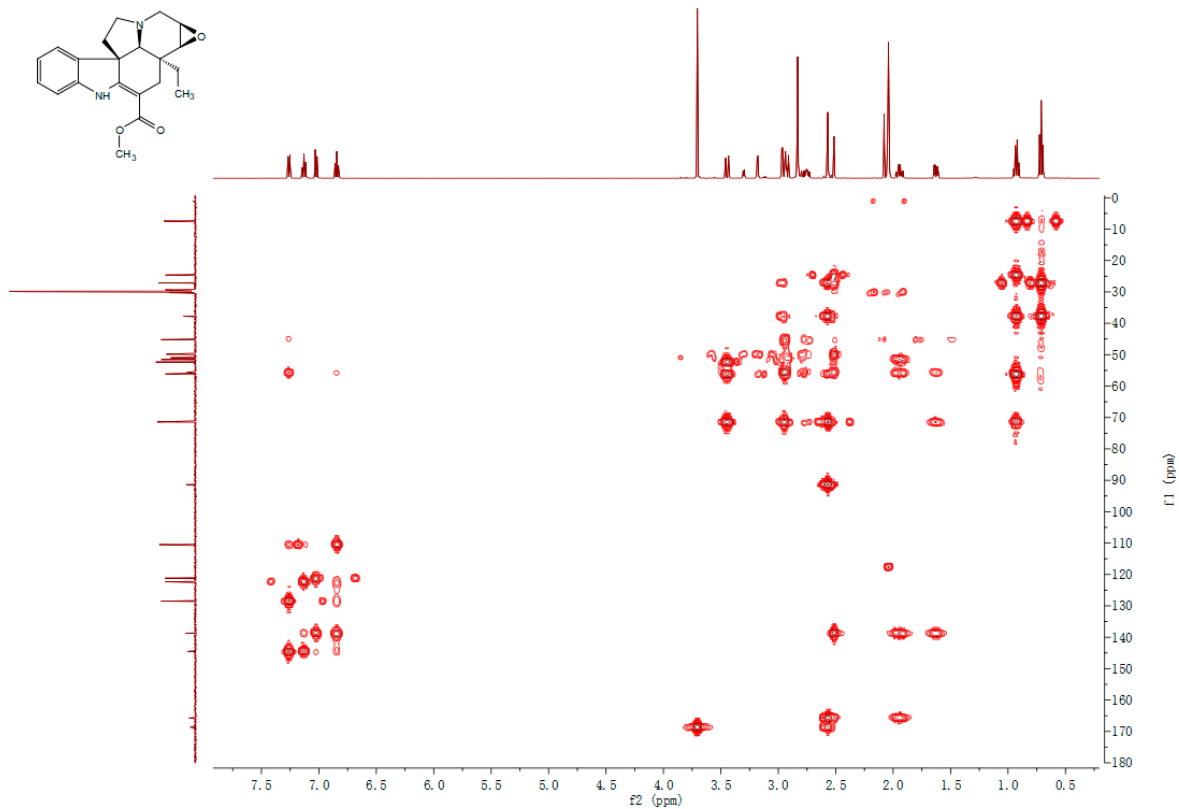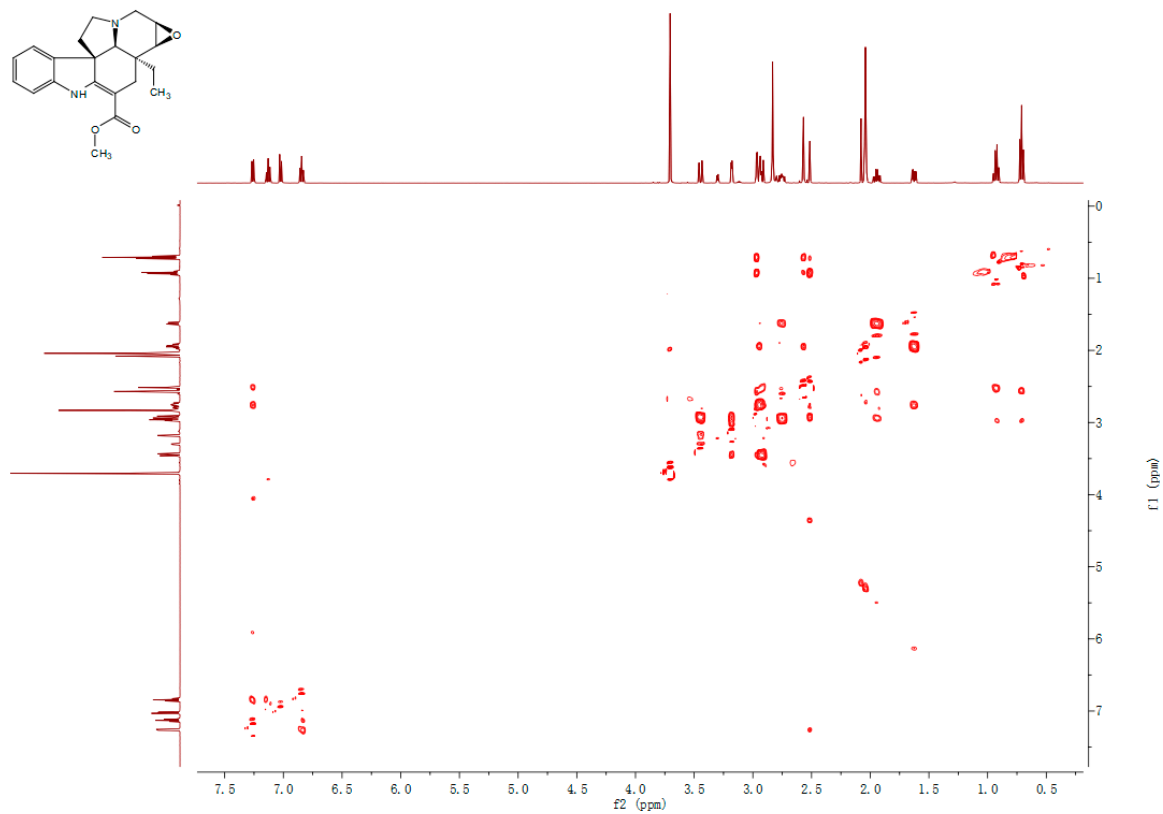

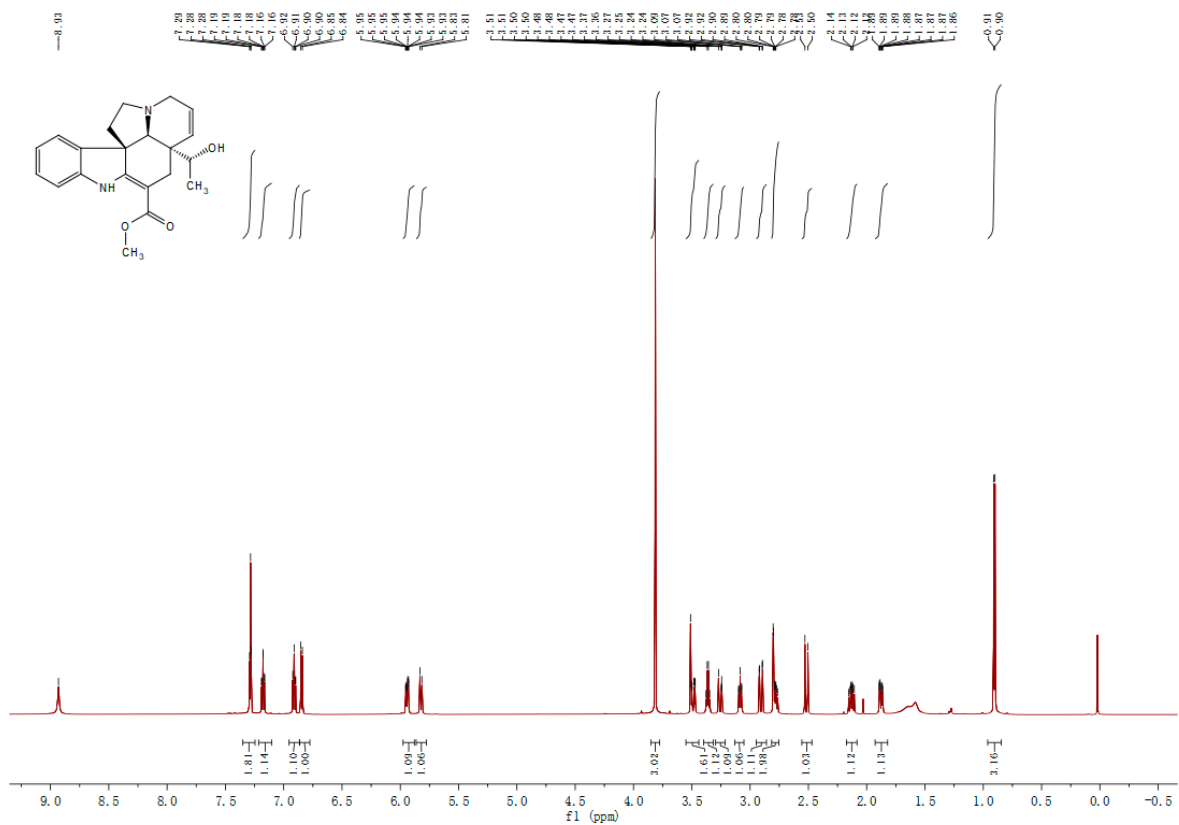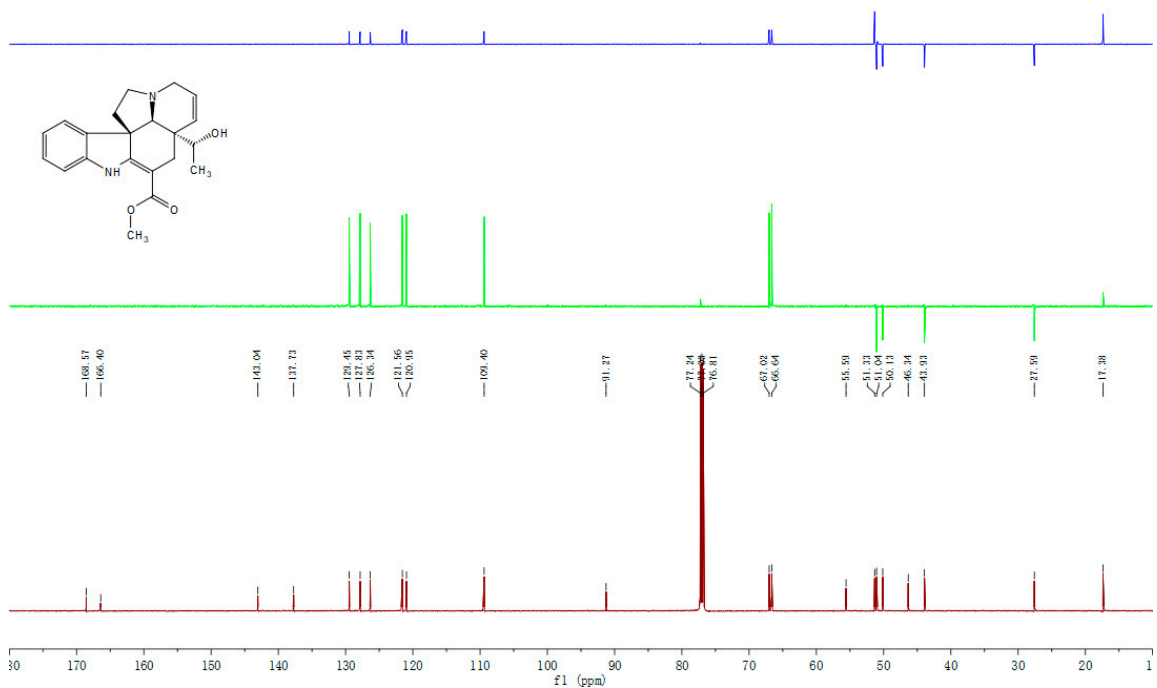

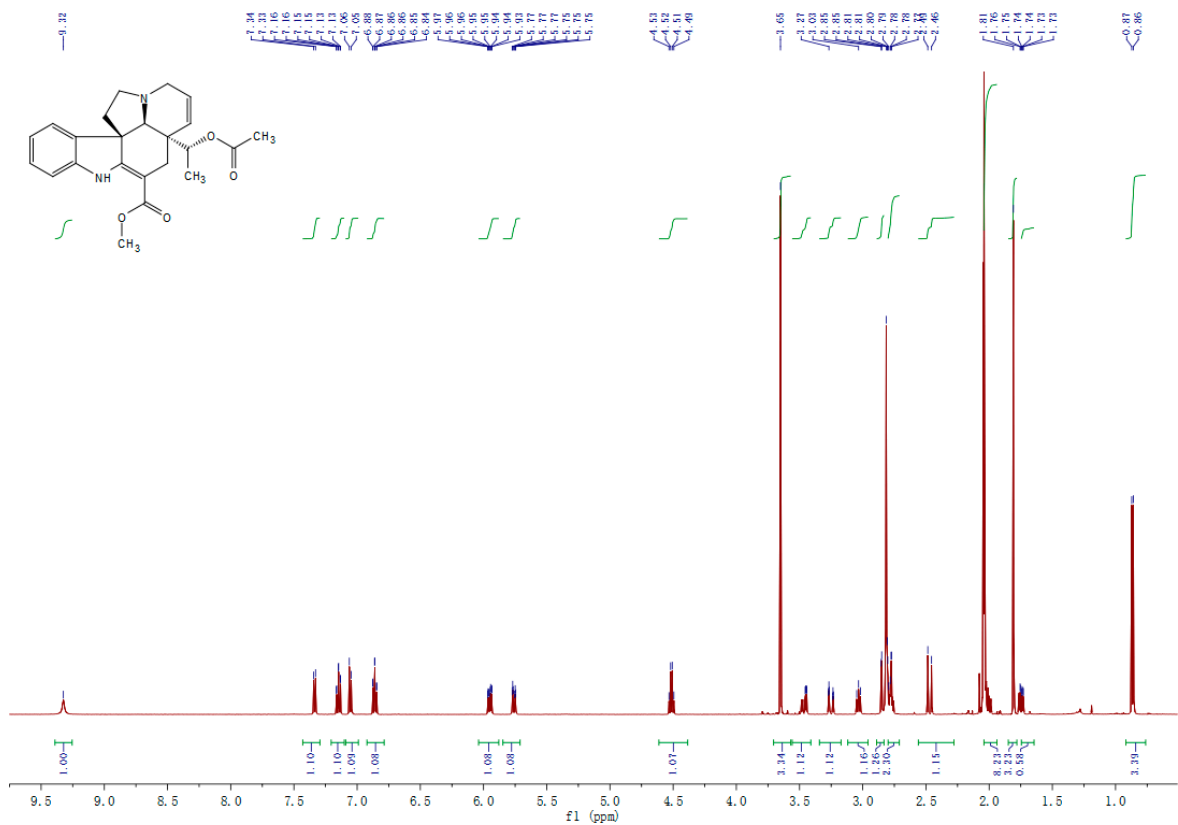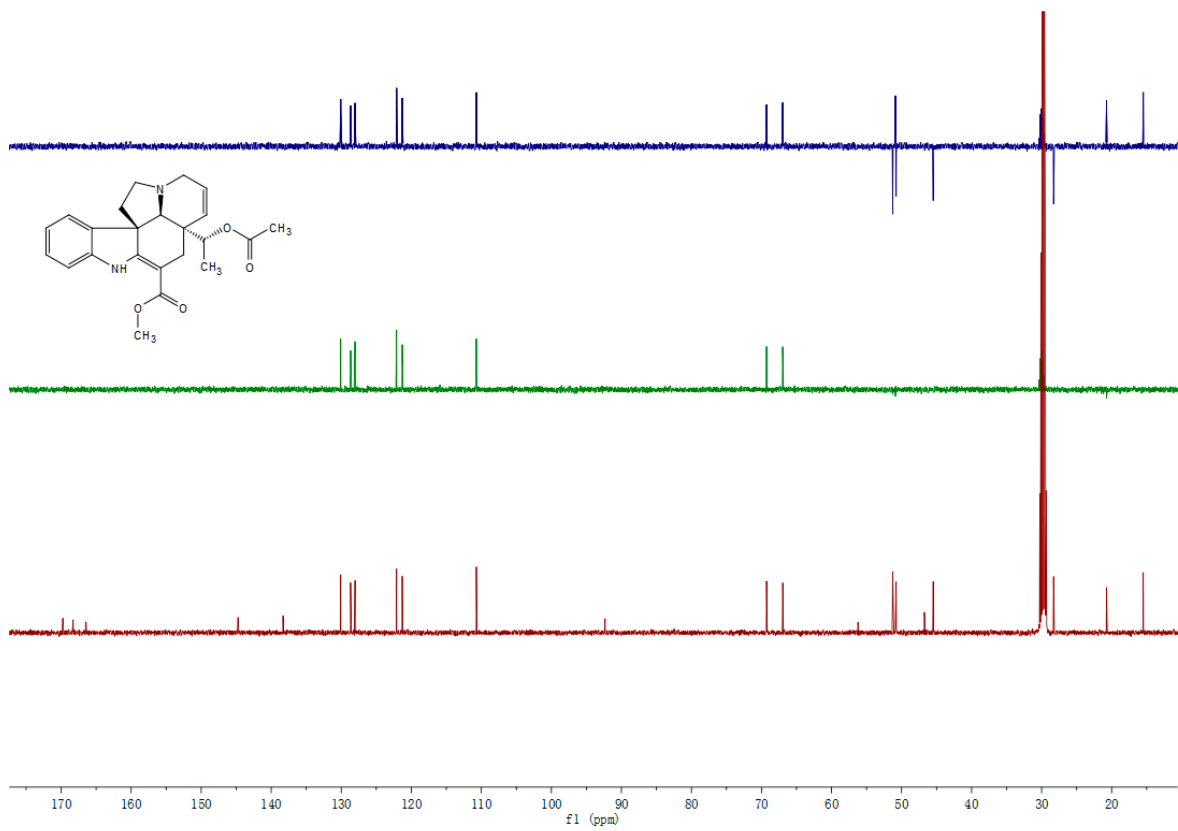

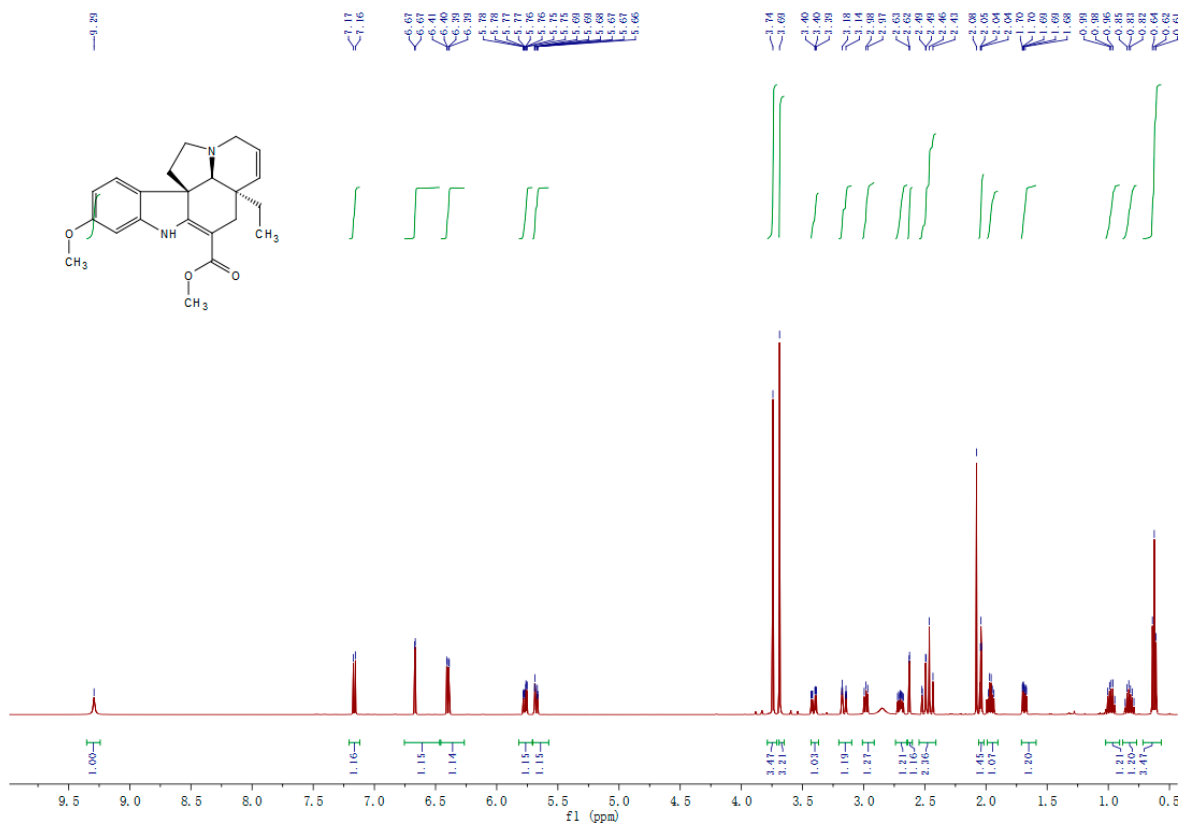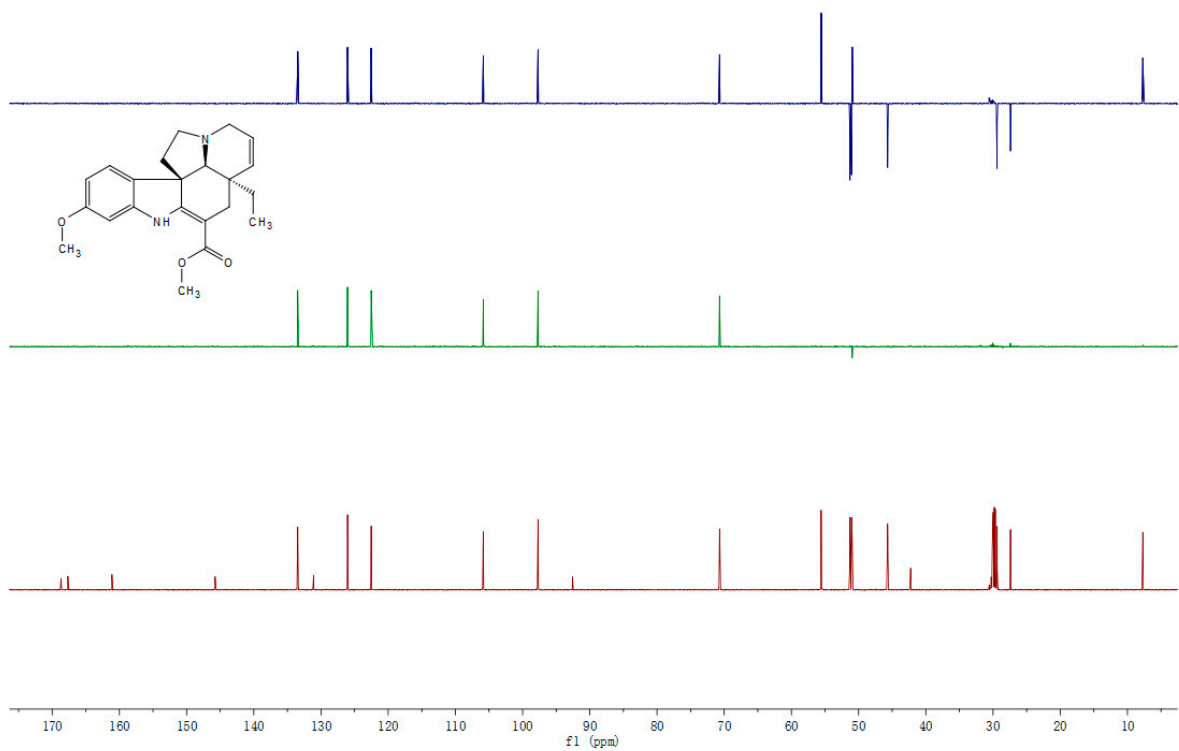

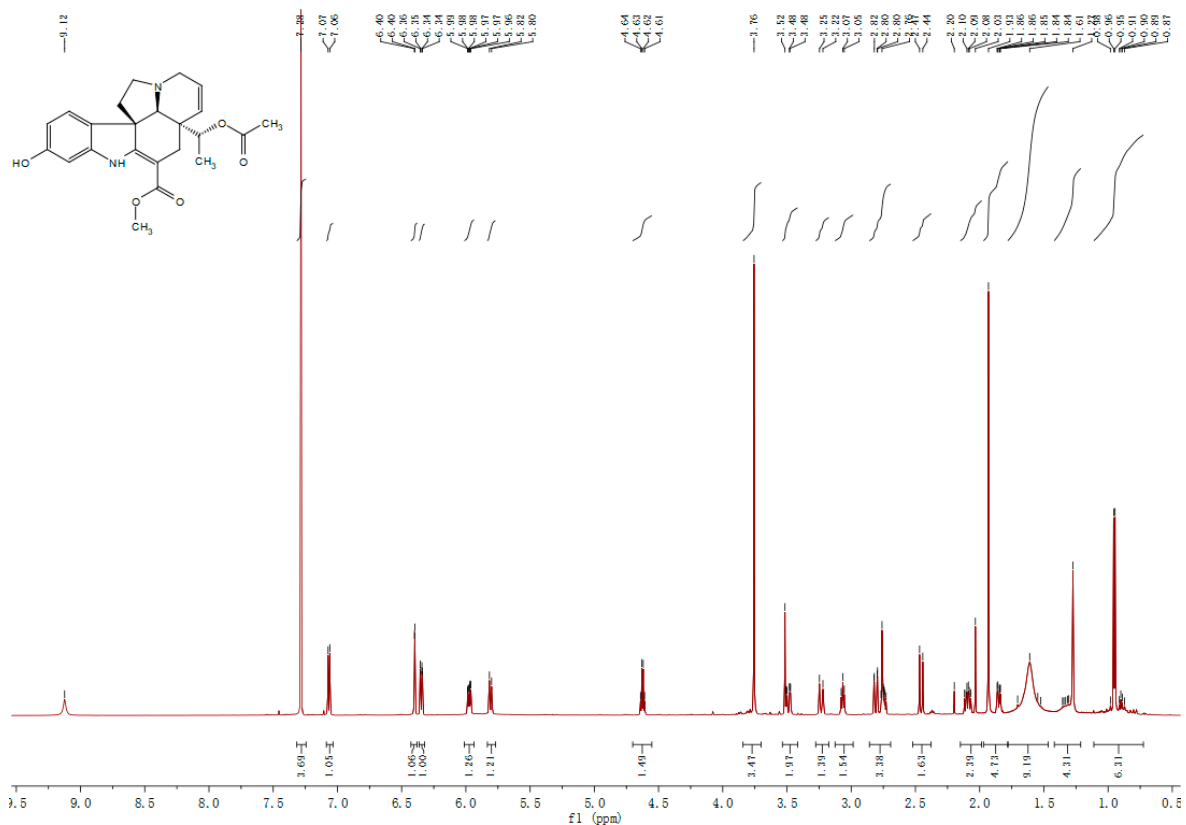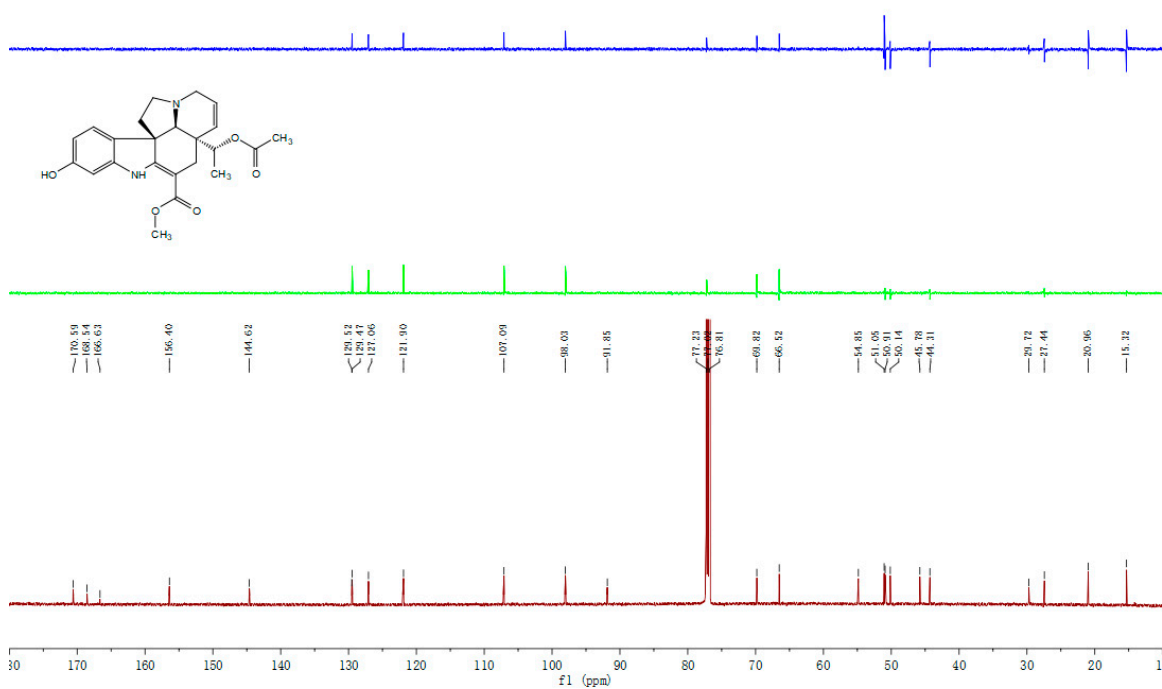

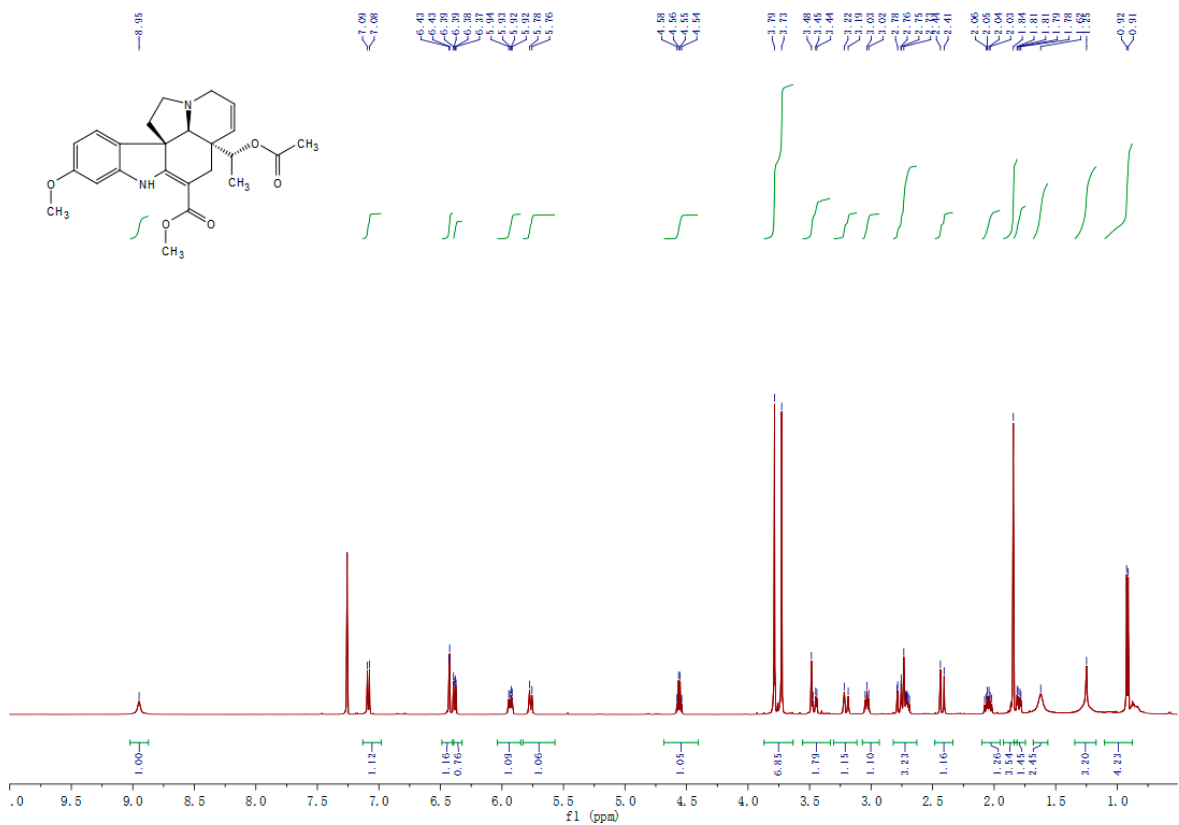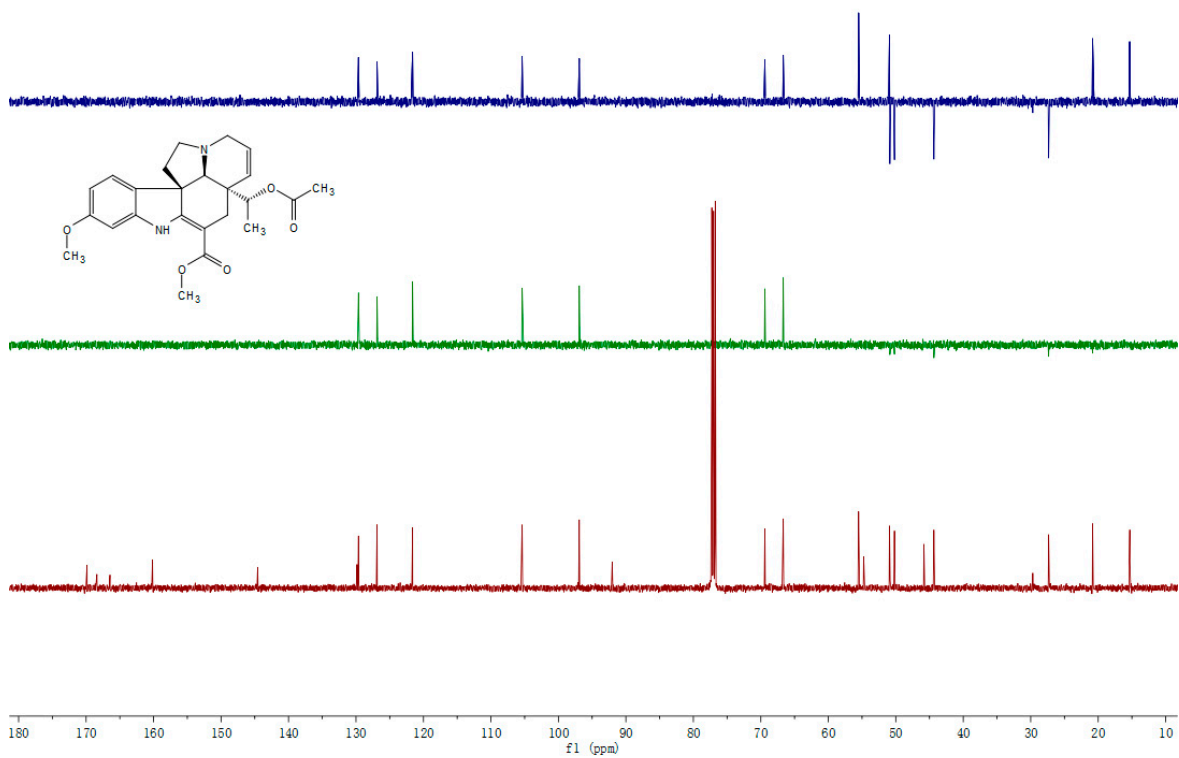

Supplement: molecules-24-01256-s001.pdf [file molecules-24-01256-s001.pdf]
